# Supplementary material for: The Close Interaction of a C−F Bond with an Amide Carbonyl: Crystallographic and Spectroscopic Characterization
Source: PubMed Central journal article supplement (PMC9544880; doi:10.1002/anie.202207966), 2022-07-13
Supplement: ANIE-61-0-s001.pdf [file ANIE-61-0-s001.pdf]

Supporting Information

**The Close Interaction of a C–F Bond with an Amide Carbonyl:  
Crystallographic and Spectroscopic Characterization**

*S. A. Harry, M. Kazim, P. M. Nguyen, A. Zhu, M. R. Xiang, J. Catazaro, M. Siegler,  
T. Lectka\**

# Supporting Information

## Contents

|                                                          |    |
|----------------------------------------------------------|----|
| <b>General Methods</b> .....                             | 2  |
| <b>Single Crystal X-Ray Crystallography</b> .....        | 2  |
| <b>Experimental Section</b> .....                        | 9  |
| <b>NMR Spectra</b> .....                                 | 12 |
| <b>UV-Vis and IR Spectra</b> .....                       | 24 |
| <b>HOESY Spectra</b> .....                               | 25 |
| <b>Lewis Acid (BBr<sub>3</sub>) Experiment NMR</b> ..... | 24 |
| <b>Amide Isomerization &amp; Enantiomerization</b> ..... | 29 |
| <b>Computational Work</b> .....                          | 32 |
| <b>Coordinates of Calculated Structures</b> .....        | 34 |

## General Methods

Unless otherwise stated, all reactions were carried out under strictly anhydrous, air-free conditions under nitrogen. All solvents and reagents were dried and degassed by standard methods.  $^1\text{H}$  and  $^{13}\text{C}$  spectra were acquired on a 400 MHz NMR whereas  $^{19}\text{F}$  NMR spectra were acquired on a 300 MHz NMR in  $\text{CDCl}_3$  or  $\text{CD}_3\text{CN}$  at 25 °C (unless otherwise stated). The  $^1\text{H}$ ,  $^{13}\text{C}$  and  $^{19}\text{F}$  chemical shifts are given in parts per million ( $\delta$ ) with respect to an internal tetramethylsilane (TMS,  $\delta$  0.00 ppm) standard. NMR data are reported in the following format: chemical shifts (multiplicity (s = singlet, d = doublet, t = triplet, q = quartet, m = multiplet), integration, coupling constants [Hz]). IR data were obtained using an FT-IR with a flat  $\text{CaF}_2$  cell. HRMS data were obtained on a Thermo Scientific Q-Exactive Orbitrap mass spectrometer. All measurements were recorded at 25 °C unless otherwise stated. Spectral data were processed with ACD/NMR Processor Academic Edition.

## Single Crystal X-Ray Crystallography

### Crystal Structure of Compound 3.

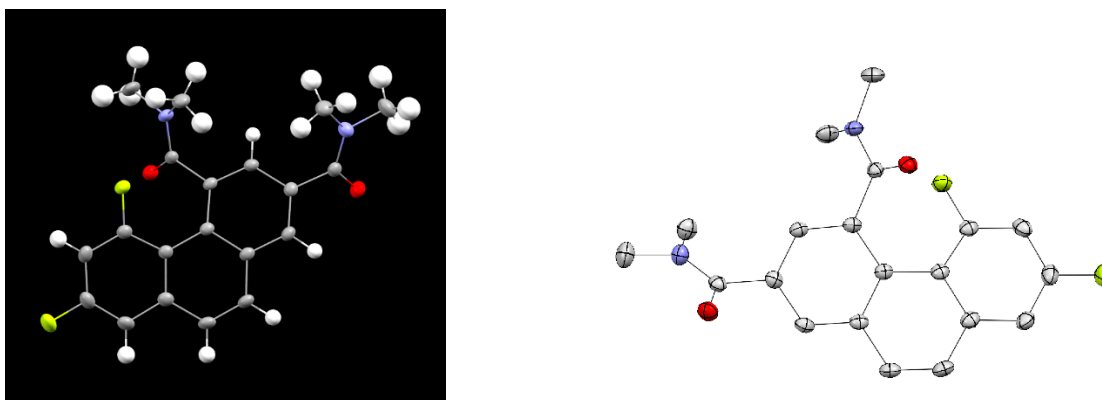

**Figure S1:** Crystal Structure of Diamide Di F and its displacement ellipsoid (50% probability level) (Compound 3)

All reflection intensities were measured at 110 K for **3** and **3** (high resolution,  $\theta_{\text{max}} = 48.98^\circ$ ) using a SuperNova diffractometer (equipped with Atlas detector) with  $\text{Mo K}\alpha$  radiation ( $\lambda = 0.71073 \text{ \AA}$ ) under the program CrysAlisPro (Version CrysAlisPro 1.171.39.29c, Rigaku OD, 2017). The same program was used to refine the cell dimensions and for data reduction. The structure was solved with the program SHELXS-2018/3 (Sheldrick, 2018) and was refined on  $F^2$  with SHELXL-2018/3 (Sheldrick, 2018). Numerical absorption correction based on gaussian integration over a multifaceted crystal model was performed using CrysAlisPro. The temperature of the data collection was controlled using the system Cryojet (manufactured by Oxford Instruments). For **3**, the H atoms were placed at calculated positions using the instructions AFIX 43 or AFIX 137 with isotropic displacement parameters having values 1.2 or 1.5  $U_{\text{eq}}$  of the attached C atoms. The structure is ordered. For **3** (high resolution), the H atoms were refined freely (i.e., coordinates and isotropic temperature factor). The C–H bond distances are found within the range 0.936(14)–1.005(14)  $\text{\AA}$ . The structures of **3** and **3** (high resolution) are ordered.

*MoPro refinements for 3 (high resolution)* - A multipolar refinement was performed using the refined ShelXL model as a starting point. The charge density was refined against structure factors using the program MoPro,<sup>[1]</sup> which experimentally determined the deformation electron density maps based on a non-spherical model of the atomic electron density.<sup>[2]</sup> The multipolar Hansen-Coppens model describes the crystal electron density as a superposition of the aspherical pseudo-atoms each modelled on a multipole expansion:

$$\rho_{\text{atom}}(r) = \rho_{\text{core}}(r) + P_{\text{val}}\kappa^3\rho_{\text{val}}(\kappa r) + \sum_l \kappa^{2l} R_l(\kappa' r) \sum_m P_{lm\pm} Y_{lm\pm}(\theta, \varphi)$$

where the first two terms are the spherically averaged Hartree-Fock core and valence electron densities of the atom, and the last term is concerned with the non-spherical valence density, which is modelled using spherical harmonics functions  $Y_{lm\pm}$ .  $P_{\text{val}}$  is the valence population,  $P_{lm\pm}$ 's are the multipole populations,  $\kappa$  and  $\kappa'$  are contraction/expansion parameters, and  $R_l$  are the radial Slater-type functions.

Before carrying out the multipolar refinement, the values of the  $U^{ij}$  parameters for H atoms were constrained to the values obtained from the SHADE server.<sup>[3]</sup> All C–H distances were restrained to fit neutron diffractions studies with a restraint sigma of 0.002 Å.<sup>[4]</sup> Those sets of constraints and restraints were kept until the end of the refinement.

The multipolar refinement was carried out using the octupole level ( $l = 3$ ) for non-H atoms (C, N, O and F), and the dipole level ( $l = 1$ ) for H atoms. The core and valence spherical scattering factors were calculated from the Su & Coppens.<sup>[5]</sup> All parameters (scale factor, XYZ,  $U^{ij}$ ,  $P_{\text{val}}$ ,  $P_{lm}$ ,  $\kappa$  and  $\kappa'$ ) were refined successfully until convergence was reached. For the H atoms, the  $\kappa$  and  $\kappa'$  values were restrained to 1.16(3).<sup>[6]</sup> **Table S3** includes the crystallographic statistics obtained from the multipolar refinement.

<sup>1</sup> C. Jelsch, B. Guillot, A. Lagoutte, C. Lecomte, J. Appl. Cryst. 2005, 38, 38-54.

<sup>2</sup> N. K. Hansen, P. Coppens, Acta Cryst. 1978, A34, 909-921.

<sup>3</sup> A. Ø. Madsen, J. Appl. Cryst. 2006, 39, 757-758.

<sup>4</sup> F. H. Allen, Acta Cryst. 1986, B42, 515-522.

<sup>5</sup> Z. Su, P. Coppens, Acta Cryst. 1998, A54, 646-652.

<sup>6</sup> R. F. Stewart, Acta Cryst. 1976, A32, 565-574.

**Table S1. Crystallographic data for 3 (ShelXL refinement)**

| <b>3</b>                                                                                                       |                                                                                                                                                                                                                                                                                              |
|----------------------------------------------------------------------------------------------------------------|----------------------------------------------------------------------------------------------------------------------------------------------------------------------------------------------------------------------------------------------------------------------------------------------|
| <b>Crystal data</b>                                                                                            |                                                                                                                                                                                                                                                                                              |
| Chemical formula                                                                                               | C <sub>20</sub> H <sub>18</sub> F <sub>2</sub> N <sub>2</sub> O <sub>2</sub>                                                                                                                                                                                                                 |
| <i>M</i> <sub>r</sub>                                                                                          | 356.36                                                                                                                                                                                                                                                                                       |
| Crystal system, space group                                                                                    | Monoclinic, <i>P</i> 2 <sub>1</sub> / <i>n</i>                                                                                                                                                                                                                                               |
| Temperature (K)                                                                                                | 110                                                                                                                                                                                                                                                                                          |
| <i>a</i> , <i>b</i> , <i>c</i> (Å)                                                                             | 11.2164 (3), 11.7704 (3), 13.3440 (3)                                                                                                                                                                                                                                                        |
| β (°)                                                                                                          | 97.951 (2)                                                                                                                                                                                                                                                                                   |
| <i>V</i> (Å <sup>3</sup> )                                                                                     | 1744.76 (8)                                                                                                                                                                                                                                                                                  |
| <i>Z</i>                                                                                                       | 4                                                                                                                                                                                                                                                                                            |
| Radiation type                                                                                                 | Mo <i>K</i> α                                                                                                                                                                                                                                                                                |
| μ (mm <sup>-1</sup> )                                                                                          | 0.10                                                                                                                                                                                                                                                                                         |
| Crystal size (mm)                                                                                              | 0.30 × 0.25 × 0.20                                                                                                                                                                                                                                                                           |
| <b>Data collection</b>                                                                                         |                                                                                                                                                                                                                                                                                              |
| Diffractometer                                                                                                 | SuperNova, Dual, Cu at zero, Atlas                                                                                                                                                                                                                                                           |
| Absorption correction                                                                                          | Gaussian<br><i>CrysAlis PRO</i> 1.171.39.46 (Rigaku Oxford Diffraction, 2018)<br>Numerical absorption correction based on gaussian integration over a multifaceted crystal model Empirical absorption correction using spherical harmonics, implemented in SCALE3 ABSPACK scaling algorithm. |
| <i>T</i> <sub>min</sub> , <i>T</i> <sub>max</sub>                                                              | 0.541, 1.000                                                                                                                                                                                                                                                                                 |
| No. of measured, independent and observed [ <i>I</i> > 2σ( <i>I</i> )] reflections                             | 24993, 3994, 3424                                                                                                                                                                                                                                                                            |
| <i>R</i> <sub>int</sub>                                                                                        | 0.029                                                                                                                                                                                                                                                                                        |
| (sin θ/λ) <sub>max</sub> (Å <sup>-1</sup> )                                                                    | 0.650                                                                                                                                                                                                                                                                                        |
| <b>Refinement</b>                                                                                              |                                                                                                                                                                                                                                                                                              |
| <i>R</i> [ <i>F</i> <sup>2</sup> > 2σ( <i>F</i> <sup>2</sup> )], <i>wR</i> ( <i>F</i> <sup>2</sup> ), <i>S</i> | 0.040, 0.112, 1.05                                                                                                                                                                                                                                                                           |
| No. of reflections                                                                                             | 3994                                                                                                                                                                                                                                                                                         |
| No. of parameters                                                                                              | 239                                                                                                                                                                                                                                                                                          |
| H-atom treatment                                                                                               | H-atom parameters constrained                                                                                                                                                                                                                                                                |
| Δρ <sub>max</sub> , Δρ <sub>min</sub> (e Å <sup>-3</sup> )                                                     | 0.33, -0.20                                                                                                                                                                                                                                                                                  |

**Table S2. Crystallographic data for 3 (high resolution) (ShelXL refinement)**

| <b>3 (high resolution)</b>                                                                                      |                                                                                                                                                                                                                                                                                               |
|-----------------------------------------------------------------------------------------------------------------|-----------------------------------------------------------------------------------------------------------------------------------------------------------------------------------------------------------------------------------------------------------------------------------------------|
| Crystal data                                                                                                    |                                                                                                                                                                                                                                                                                               |
| Chemical formula                                                                                                | C <sub>20</sub> H <sub>18</sub> F <sub>2</sub> N <sub>2</sub> O <sub>2</sub>                                                                                                                                                                                                                  |
| <i>M</i> <sub>r</sub>                                                                                           | 356.36                                                                                                                                                                                                                                                                                        |
| Crystal system, space group                                                                                     | Monoclinic, <i>P</i> 2 <sub>1</sub> / <i>n</i>                                                                                                                                                                                                                                                |
| Temperature (K)                                                                                                 | 110                                                                                                                                                                                                                                                                                           |
| <i>a</i> , <i>b</i> , <i>c</i> (Å)                                                                              | 11.2010 (2), 11.7537 (2), 13.3352 (2)                                                                                                                                                                                                                                                         |
| β (°)                                                                                                           | 97.9274 (16)                                                                                                                                                                                                                                                                                  |
| <i>V</i> (Å <sup>3</sup> )                                                                                      | 1738.84 (5)                                                                                                                                                                                                                                                                                   |
| <i>Z</i>                                                                                                        | 4                                                                                                                                                                                                                                                                                             |
| Radiation type                                                                                                  | Mo <i>K</i> α                                                                                                                                                                                                                                                                                 |
| μ (mm <sup>-1</sup> )                                                                                           | 0.10                                                                                                                                                                                                                                                                                          |
| Crystal size (mm)                                                                                               | 0.53 × 0.45 × 0.31                                                                                                                                                                                                                                                                            |
| Data collection                                                                                                 |                                                                                                                                                                                                                                                                                               |
| Diffractometer                                                                                                  | SuperNova, Dual, Cu at zero, Atlas                                                                                                                                                                                                                                                            |
| Absorption correction                                                                                           | Gaussian<br><i>CrysAlis PRO</i> 1.171.41.93a (Rigaku Oxford Diffraction, 2020)<br>Numerical absorption correction based on gaussian integration over a multifaceted crystal model Empirical absorption correction using spherical harmonics, implemented in SCALE3 ABSPACK scaling algorithm. |
| <i>T</i> <sub>min</sub> , <i>T</i> <sub>max</sub>                                                               | 0.200, 1.000                                                                                                                                                                                                                                                                                  |
| No. of measured, independent and observed [ <i>I</i> > 2σ( <i>I</i> )] reflections                              | 95342, 17430, 12063                                                                                                                                                                                                                                                                           |
| <i>R</i> <sub>int</sub>                                                                                         | 0.041                                                                                                                                                                                                                                                                                         |
| (sin θ/λ) <sub>max</sub> (Å <sup>-1</sup> )                                                                     | 1.062                                                                                                                                                                                                                                                                                         |
| Refinement                                                                                                      |                                                                                                                                                                                                                                                                                               |
| <i>R</i> [ <i>F</i> <sup>2</sup> > 2σ ( <i>F</i> <sup>2</sup> )], <i>wR</i> ( <i>F</i> <sup>2</sup> ), <i>S</i> | 0.050, 0.151, 1.05                                                                                                                                                                                                                                                                            |
| No. of reflections                                                                                              | 17430                                                                                                                                                                                                                                                                                         |
| No. of parameters                                                                                               | 307                                                                                                                                                                                                                                                                                           |
| H-atom treatment                                                                                                | All H-atom parameters refined                                                                                                                                                                                                                                                                 |
| Δρ <sub>max</sub> , Δρ <sub>min</sub> (e Å <sup>-3</sup> )                                                      | 0.67, -0.25                                                                                                                                                                                                                                                                                   |

**Table S3. Crystallographic statistics for 3 (high resolution) from the MoPro refinement**

|                                                                     | <b>3 (high resolution)</b>    |
|---------------------------------------------------------------------|-------------------------------|
| Refinement                                                          |                               |
| No. of unique reflections effectively used                          | 16158                         |
| No. of parameters                                                   | 847                           |
| $R[F^2 > 2\sigma(F^2)]$ , $wR(F^2)$ , S                             | 0.037, 0.045, 1.02            |
| H-atom treatment                                                    | All H-atom parameters refined |
| $\Delta\rho_{\max}$ , $\Delta\rho_{\min}$ (e Å <sup>-3</sup> ), rms | 0.391, -0.321, 0.072          |

## Crystal Structure of Compound 4

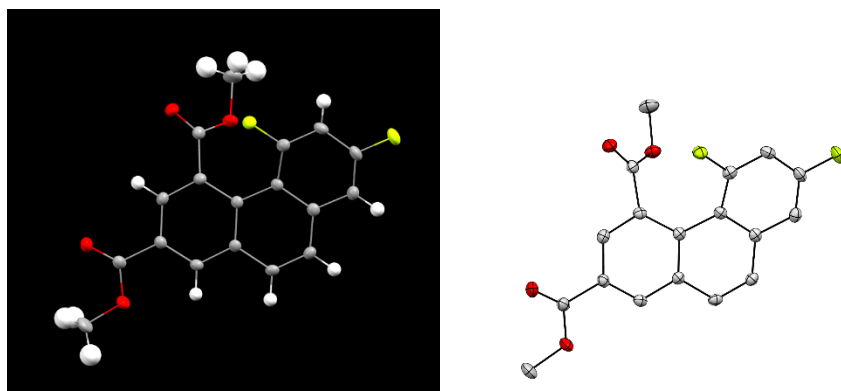

**Figure S2:** Crystal structure of Diester di F and its displacement ellipsoid (50% probability level) (Compound 4)

All reflection intensities were measured at 110(2) K for **4** using a SuperNova diffractometer (equipped with Atlas detector) with Mo  $K\alpha$  radiation ( $\lambda = 0.71073 \text{ \AA}$ ) under the program CrysAlisPro (Version CrysAlisPro 1.171.39.29c, Rigaku OD, 2017). The same program was used to refine the cell dimensions and for data reduction. The structure was solved with the program SHELXS-2018/3 (Sheldrick, 2018) and was refined on  $F^2$  with SHELXL-2018/3 (Sheldrick, 2018). Numerical absorption correction based on gaussian integration over a multifaceted crystal model was applied using CrysAlisPro. The temperature of the data collection was controlled using the system Cryojet (manufactured by Oxford Instruments). The H atoms were placed at calculated positions using the instructions AFIX 43 or AFX 137 with isotropic displacement parameters having values 1.2 or 1.5  $U_{\text{eq}}$  of the attached C atoms. The structure is ordered.

**Table S4. Crystallographic data for 4 (ShelXL refinement)**

|                             | <b>4</b>                                         |
|-----------------------------|--------------------------------------------------|
| Crystal data                |                                                  |
| Chemical formula            | $\text{C}_{18}\text{H}_{12}\text{F}_2\text{O}_4$ |
| $M_r$                       | 330.28                                           |
| Crystal system, space group | Monoclinic, $P2_1/c$                             |
| Temperature (K)             | 110                                              |
| $a, b, c$ ( $\text{\AA}$ )  | 9.9816 (6), 7.0631 (3), 20.6277 (11)             |
| $\beta$ ( $^\circ$ )        | 91.369 (5)                                       |
| $V$ ( $\text{\AA}^3$ )      | 1453.86 (13)                                     |
| $Z$                         | 4                                                |
| Radiation type              | Mo $K\alpha$                                     |
| $\mu$ ( $\text{mm}^{-1}$ )  | 0.12                                             |



|                                                                            |                                                                                                                                                                                                                                                                                               |
|----------------------------------------------------------------------------|-----------------------------------------------------------------------------------------------------------------------------------------------------------------------------------------------------------------------------------------------------------------------------------------------|
| Crystal size (mm)                                                          | 0.29 × 0.19 × 0.04                                                                                                                                                                                                                                                                            |
| Data collection                                                            |                                                                                                                                                                                                                                                                                               |
| Diffractometer                                                             | SuperNova, Dual, Cu at zero, Atlas                                                                                                                                                                                                                                                            |
| Absorption correction                                                      | Gaussian<br><i>CrysAlis PRO</i> 1.171.41.93a (Rigaku Oxford Diffraction, 2020)<br>Numerical absorption correction based on gaussian integration over a multifaceted crystal model Empirical absorption correction using spherical harmonics, implemented in SCALE3 ABSPACK scaling algorithm. |
| $T_{\min}, T_{\max}$                                                       | 0.586, 1.000                                                                                                                                                                                                                                                                                  |
| No. of measured, independent and observed [ $I > 2\sigma(I)$ ] reflections | 17281, 3336, 2617                                                                                                                                                                                                                                                                             |
| $R_{\text{int}}$                                                           | 0.041                                                                                                                                                                                                                                                                                         |
| $(\sin \theta/\lambda)_{\text{max}}$ ( $\text{\AA}^{-1}$ )                 | 0.650                                                                                                                                                                                                                                                                                         |
| Refinement                                                                 |                                                                                                                                                                                                                                                                                               |
| $R[F^2 > 2\sigma(F^2)], wR(F^2), S$                                        | 0.044, 0.122, 1.04                                                                                                                                                                                                                                                                            |
| No. of reflections                                                         | 3336                                                                                                                                                                                                                                                                                          |
| No. of parameters                                                          | 219                                                                                                                                                                                                                                                                                           |
| H-atom treatment                                                           | H-atom parameters constrained                                                                                                                                                                                                                                                                 |
| $\Delta\rho_{\text{max}}, \Delta\rho_{\text{min}}$ ( $\text{e \AA}^{-3}$ ) | 0.34, -0.24                                                                                                                                                                                                                                                                                   |

Computer programs: *CrysAlis PRO* 1.171.39.29c (Rigaku OD, 2017), *SHELXS2018/3* (Sheldrick, 2018), *SHELXL2018/3* (Sheldrick, 2018), *SHELXTL* v6.10 (Sheldrick, 2008).

## Experimental Section

### Synthesis and Characterization of Compounds

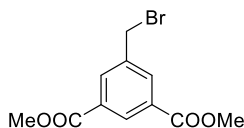

**Dimethyl-5-(bromomethyl)isophthalate (Compound A):** Compound **A** was synthesized from isophthalic acid following previously reported protocols.<sup>7</sup>

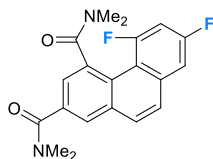

**5,7-difluoro-N2,N2,N4,N4-tetramethylphenanthrene-2,4-dicarboxamide (Compound 3):** Compound **A** (1g, 3.5 mmol) was dissolved in 45 mL dichloromethane containing triphenylphosphine (920 mg, 3.5 mmol) and the solution was stirred at room temperature. After the <sup>1</sup>H NMR revealed complete conversion of **A**, solvent was evaporated under reduced pressure, the mixture was dissolved in 100 mL of 1:1 MeOH and THF and lithium metal was added (74 mg, 10.5 mmol). After stirring the mixture at room temperature for 10 minutes, a solution of 3,5-difluorobenzaldehyde (500 mg, 3.5 mmol) in 15 mL THF was added. Once <sup>1</sup>H NMR revealed complete consumption of the intermediate phosphonium ylid, reaction mixture was extracted with 100 mL ethyl acetate and washed with 100 mL 1M HCl and 100 mL brine. Organic layer was dried over anhydrous sodium sulfate and evaporated under reduced pressure. This mixture was filtered through a plug of silica gel and washed with 20% ethyl acetate in hexanes to collect the cis/trans stilbene mixture which was functionalized without further purification. The mixture of cis and trans stilbene was dissolved in 60 mL water, KOH (1.2 g, 21 mmol) was added, and the mixture was refluxed for 6 hours. Thereafter, the mixture was acidified with 1M HCl, extracted with 100 mL ethyl acetate, and washed with 100 mL brine. Organic layer was dried over anhydrous sodium sulfate and evaporated under reduced pressure to obtain the intermediate cis/trans stilbene diacid. The intermediate diacid was suspended in 45 mL dichloromethane, thionyl chloride (2 mL) and DMF (4 drops) were added, and the mixture was refluxed for 4 hours. After completion, solvents were evaporated under reduced pressure, the mixture was dissolved in 200 mL cyclohexane, I<sub>2</sub> (100 mg) was added, and the mixture was irradiated with 254 nm light in a rayonet photochemical reactor for 14 hours. Thereafter, excess iodine was quenched with solid sodium thiosulfate, filtered, and the solvent was evaporated under reduced pressure. Finally, the mixture was dissolved in 45 mL dichloromethane, dimethylamine hydrochloride (1.7 g, 21 mmol), and sodium bicarbonate (2.5 g) were added, and the mixture was stirred at room temperature for 2 hours. The mixture was then washed with 50 mL 1M HCl, 50 mL brine, dried over anhydrous sodium sulfate and evaporated under reduced pressure. Final product (compound **3**) was purified with silica gel chromatography using ethyl acetate (60% in hexane) initially to remove by-products followed by 5% methanol in ethyl acetate as a yellow solid (105 mg, 8.5% overall yield). <sup>1</sup>H NMR (CDCl<sub>3</sub>) δ 7.96 (d, J = 1.5 Hz, 1H), 7.63 – 7.78 (m, 3H), 7.36 (dd, J = 1.9 Hz, 1.2 Hz, 1H), 7.03 – 7.14 (m, 1H), 3.00 – 3.25 (m, 12H); <sup>13</sup>C NMR (CDCl<sub>3</sub>) δ 172.4 (d, J = 6.3 Hz), 170.2, 162.0 (m), 159.4 (m), 136.2 (m), 135.8 (m), 133.8, 133.3, 129.2, 128.5, 127.3 (m), 126.1, 125.3, 115.2 (m), 109.0 (m), 103.4 (m), 39.8 (m), 39.7, 35.5, 35.0; <sup>19</sup>F NMR (CDCl<sub>3</sub>) δ -103.7 (1F, m), -110.1 (1F, m); <sup>19</sup>F NMR {<sup>1</sup>H} (CDCl<sub>3</sub>) δ -103.7 (1F, d), -110.1 (1F, d); IR 3064, 2826, 1622, 1603 (cm<sup>-1</sup>, CaF<sub>2</sub>, CH<sub>2</sub>Cl<sub>2</sub>); FTMS + p (ESI) calc for C<sub>20</sub>H<sub>19</sub>O<sub>2</sub>N<sub>2</sub>F<sub>2</sub><sup>+</sup>: 357.1415, found 357.1407.

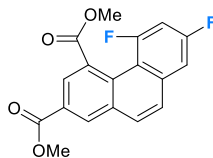

<sup>7</sup> Feng, Y.; Liu, Z.; Chen, H.; Yan, Z.; He, Y.; Liu, C.; Fan, Q. *Chem. Eur. J.* **2014**, *20*, 7069-7082.

**Dimethyl 5,7-difluorophenanthrene-2,4-dicarboxylate (Compound 4):** Compound **4** was synthesized following similar protocol to the synthesis of compound **3** with a modification of the final step. After cyclization in the rayonet photochemical reactor, the mixture was dissolved in 45 mL methanol and the mixture was stirred at room temperature for 2 hours. Solvent was then evaporated under reduced pressure, reaction mixture was extracted with 45 mL ethyl acetate and washed with 45 mL 1M HCl, 45 mL brine, dried over anhydrous sodium sulfate and evaporated under reduced pressure. Product **4** was purified using silica gel chromatography with 10% ethyl acetate in hexanes as a light-yellow solid.  $^1\text{H NMR}$  ( $\text{CDCl}_3$ )  $\delta$  8.62 – 8.66 (m, 1H), 8.60 (d,  $J = 1.7$  Hz, 1H), 7.67 – 7.86 (m, 2H), 7.39 (dd,  $J = 2$  Hz, 8.5 Hz, 1H), 7.05 – 7.16 (m, 1H), 4.01 (s, 3H), 3.94 (s, 3H);  $^{13}\text{C NMR}$  ( $\text{CDCl}_3$ )  $\delta$  169.1 (d,  $J = 3.7$  Hz), 165.9, 162.5 (m), 160.0 (m), 164.4 (m), 133.1, 132.5, 132.0 (d), 129.0, 128.96, 127.7, 127.3 (m), 127.27 (m), 52.5, 52.4;  $^{19}\text{F NMR}$  ( $\text{CDCl}_3$ )  $\delta$  -101.6 (1F, m), -108.5 (1F, m);  $^{19}\text{F NMR}$  { $^1\text{H}$ } ( $\text{CDCl}_3$ )  $\delta$  -101.6 (1F, d), -108.5 (1F, d); FTMS + p (ESI) calc for  $\text{C}_{18}\text{H}_{13}\text{O}_4\text{F}_2^+$ : 331.0782, found 331.0779.

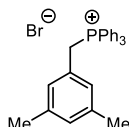

**(3,5-dimethylbenzyl)triphenylphosphonium bromide (Compound B):** Compound **B** was synthesized following previously reported protocols.<sup>8</sup>

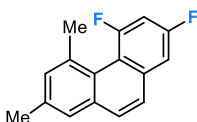

**2,4-difluoro-5,7-dimethylphenanthrene (Compound C):** Compound **B** (5g, 10.84 mmol) was dissolved in 100 mL (1:1) mixture of THF and methanol and lithium metal (230 mg, 32.5 mmol) were added to the mixture. After stirring the mixture at room temperature for 10 minutes, a solution of 3,5-difluorobenzaldehyde (1.54g, 10.84 mmol) was added dropwise and the mixture was stirred at room temperature overnight. The mixture was then extracted with 100 mL ethyl acetate and washed with 100 mL 1M HCl, 100 mL brine, dried over anhydrous sodium sulfate and evaporated under reduced pressure. The mixture was then filtered over a plug of silica gel with hexanes to collect the cis and trans dimethyl stilbene intermediate. After complete evaporation of the solvents, the cis/trans dimethyl stilbene was dissolved in 400 mL cyclohexanes,  $\text{I}_2$  (80 mg) was added, and the mixture was irradiated with 254 nm light in a rayonet photochemical reactor for 4 days. Thereafter, excess iodine was quenched with solid sodium thiosulfate and the solvents were evaporated under reduced pressure. Cyclized product Compound **C** was isolated with silica gel chromatography using hexanes as a dense colorless liquid which solidified after a few days (788 mg, 30% overall yield). Compound **C** was further purified by recrystallization in methanol at freezing temperature.  $^1\text{H NMR}$  ( $\text{CDCl}_3$ )  $\delta$  7.59 – 7.64 (m, 1H), 7.52 (d,  $J = 1.9$  Hz, 1H), 7.47 – 7.50 (m, 1H), 7.31 – 7.41 (m, 2H), 7.03 – 7.13 (m, 1H), 2.68 (d,  $J = 12.6$  Hz, 3H), 2.54 (s, 3H);  $^{13}\text{C NMR}$  ( $\text{CDCl}_3$ )  $\delta$  161.5 (m), 160.7 (m), 159.1 (m), 158.2 (m), 136.3, 135.5 (m), 133.1, 132.2, 129.5, 125.4, 124.9 (m), 116.1 (m), 108.0 (m), 102.6, 102.3 (m), 102.0, 23.3 (m), 21.1;  $^{19}\text{F NMR}$  ( $\text{CDCl}_3$ )  $\delta$  -96.6 (1F, m), -113.8 (1F, m); FTMS + p (ESI) calc for  $\text{C}_{16}\text{H}_{12}\text{F}_2^+$ : 242.2639, found 242.2844.

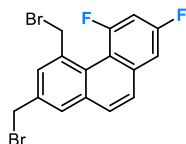

**2,4-bis(bromomethyl)-5,7-difluorophenanthrene (Compound 6):** Compound **C** (500 mg, 2.06 mmol) was dissolved in 50 mL anhydrous benzene containing NBS (210 mg, 4.33 mmol) and benzoyl peroxide (50 mg, 0.21 mmol) at room temperature under  $\text{N}_2$ . The mixture was then refluxed overnight under  $\text{N}_2$ . After completion, the mixture was extracted with 50 mL ethyl acetate, washed with 100 mL sodium bicarbonate solution, 100 mL brine, dried over anhydrous sodium sulfate, and the organic solvents were evaporated under reduced pressure. Dibrominated compound **6** was isolated with silica gel chromatography using 15% ethyl acetate in hexanes as a white solid (544 mg, 66% yield).  $^1\text{H NMR}$  ( $\text{CDCl}_3$ )  $\delta$  7.99 (d, 1H,  $J = 1.90$  Hz), 7.81 (d, 1H,  $J = 1.91$  Hz), 7.65 – 7.70 (m, 1H), 7.58 – 7.64 (m, 1H), 7.38 – 7.43 (m,

<sup>8</sup> Stammel, C.; Froehlich, R.; Wolff, C.; Wenck, H.; De Meijere, A.; Mattay, J. *Eur. J. Org. Chem.*, **1999**, 7, 1709–1718.

1H), 7.10 – 7.18 (m, 1H), 5.06 – 5.11 (d, 2H, J = 5.5 Hz), 4.72 (s, 2H); <sup>13</sup>C NMR (CDCl<sub>3</sub>) δ 162.2 (m), 160.7 (m), 159.7 (m), 158.1 (m), 136.4, 132.8, 132.3, 129.1, 128.1, 126.2, 125.0, 114.9 (m), 108.8 (m), 103.2, 102.9 (m), 102.6, 34.3 (m), 32.4 (m); <sup>19</sup>F NMR (CDCl<sub>3</sub>) δ –99.9 (1F, m), –110.3 (1F, m); TOF MS (FD+) calc for C<sub>16</sub>H<sub>10</sub>Br<sub>2</sub>F<sub>2</sub><sup>+</sup>: 397.9117, found 397.9102.

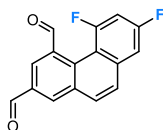

**5,7-difluorophenanthrene-2,4-dicarbaldehyde (Compound 7):** Compound **6** (500 mg, 1.25 mmol) was dissolved in 40 mL acetonitrile containing silver nitrate (1.1g, 6.25 mmol) at room temperature and then the mixture was refluxed for 2 hours. After the <sup>1</sup>H NMR of the mixture revealed complete conversion of compound **6**, it was filtered over celite, and the solvent was evaporated under reduced pressure. The intermediate nitrate ester was dissolved in 50 mL ethanol, Pd/C (50 mg) was added, and the mixture was treated with hydrogen gas until <sup>1</sup>H NMR revealed complete conversion to the intermediate dialcohol. After filtering out excess Pd/C and evaporation of the solvent, the mixture was dissolved in 40 mL anhydrous dichloromethane. To the mixture were added molecular sieves (2g), potassium carbonate (1.2g, 8.7 mmol) and PCC (590 mg, 2.75 mmol) and stirred at room temperature for 2 hours. Upon completion, the mixture was filtered over celite, and solvent was evaporated under reduced pressure. The final product (dialdehyde **7**) was isolated with silica gel chromatography using 10% ethyl acetate in hexanes as a light-yellow solid (277 mg, 82% yield). <sup>1</sup>H NMR (CDCl<sub>3</sub>) δ 10.24–10.29 (d, J = 14 Hz, 1H), 10.27 (s, 1H), 8.49–8.63 (m, 2H), 7.88–7.96 (m, 1H), 7.78–7.86 (m, 1H), 7.45–7.53 (m, 1H), 7.15–7.24 (m, 1H); <sup>13</sup>C NMR (CDCl<sub>3</sub>) δ 190.8, 189.2 (d, 15.6 Hz), 163.4 (m), 161.5 (m), 160.9 (m), 158.9 (m), 137.0 (m), 135.5 (m), 134.3, 134.1, 132.7 (m), 129.1 (m), 128.3, 127.9 (m), 114.4 (m), 109.4 (m), 104.2, 103.9 (m), 103.6; <sup>19</sup>F NMR (CDCl<sub>3</sub>) δ –105.3 (1F, m), –106.2 (1F, m); FTMS + p (ESI) calc for C<sub>16</sub>H<sub>9</sub>O<sub>2</sub>F<sub>2</sub><sup>+</sup>: 271.0571, found 271.0568.

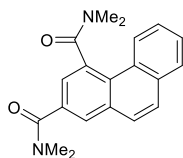

**N2,N2,N4,N4-tetramethylphenanthrene-2,4-dicarboxamide (Compound 8):** Compound **A** (750 mg, 2.6 mmol) was dissolved in 45 mL dichloromethane containing triphenylphosphine (690 mg, 2.6 mmol) and the solution was stirred at room temperature. After the <sup>1</sup>H NMR revealed complete conversion of **A**, solvent was evaporated under reduced pressure, the mixture was dissolved in 100 mL of (1:1) THF:MeOH and lithium metal was added (55 mg, 7.8 mmol). After stirring the mixture at room temperature for 10 minutes, a solution of benzaldehyde (0.29 mL, 2.86 mmol) in 10 mL THF was added. Once <sup>1</sup>H NMR revealed complete consumption of the intermediate phosphonium salt, reaction mixture was extracted with 100 mL ethyl acetate and washed with 100 mL 1M HCl and 100 mL brine. Organic layer was dried over anhydrous sodium sulfate and evaporated under reduced pressure. This mixture was filtered through a plug of silica gel and washed with 20% ethyl acetate in hexanes to collect the cis/trans stilbene mixture, which was dissolved in 200 mL cyclohexane, I<sub>2</sub> (80 mg) was added, and the mixture was irradiated with 254 nm light in a rayonet photochemical reactor for 14 hours. Thereafter, excess iodine was quenched with solid sodium thiosulfate, filtered, and the solvent was evaporated under reduced pressure. Intermediate cyclized diester was isolated with silica gel chromatography using 15% ethyl acetate in hexanes and then suspended in 40 mL water containing (230 mg, 4.1 mmol) of KOH, and the mixture was refluxed for 6 hours. After complete consumption of the diester, the mixture was acidified with 1M HCl, extracted with 50 mL ethyl acetate, washed with brine, organic layer was dried over anhydrous sodium sulfate and evaporated under reduced pressure. Intermediate diacid was suspended in 40 mL anhydrous dichloromethane, thionyl chloride (0.3 mL, 4.1 mmol) and DMF (4 drops) were added, and the mixture was refluxed under N<sub>2</sub> for 3 hours. After evaporating excess solvents under reduced pressure, the mixture was redissolved in 50 mL anhydrous dichloromethane, dimethylamine hydrochloride (165 mg, 2 mmol) and sodium bicarbonate (345 mg, 4.1 mmol) were added, and the mixture was stirred at room temperature for 2 hours. After completion, mixture was extracted with additional 30 mL dichloromethane, washed with 80 mL 1M HCl, 80 mL brine, dried over anhydrous sodium sulfate and evaporated under reduced pressure. Product **8** was isolated with silica gel chromatography using 10% methanol in ethyl acetate as a white solid (58 mg, 7% overall yield). <sup>1</sup>H NMR (CDCl<sub>3</sub>) δ 8.38 – 8.49 (m, 1H), 7.97 – 8.03 (m, 1H), 7.87 – 7.94 (m, 1H), 7.71 – 7.83 (m, 2H), 7.52 – 7.67 (m, 3H), 3.27 (s, 3H), 3.16 (s, 3H), 3.05 (s, 3H), 2.58 (s, 3H); <sup>13</sup>C NMR (CDCl<sub>3</sub>) δ 172.9, 170.5, 134.4, 134.0, 133.3, 132.8, 129.0, 128.8, 128.5, 127.4, 127.30, 127.28,

127.2, 124.9, 124.7, 39.8, 38.3, 35.5, 35.1; IR 3066, 2928, 1634 (cm<sup>-1</sup>, CaF<sub>2</sub>, CH<sub>2</sub>Cl<sub>2</sub>); FTMS + p (ESI) calc for C<sub>20</sub>H<sub>21</sub>O<sub>2</sub>N<sub>2</sub><sup>+</sup>: 321.1603, found 321.1600.

## NMR Spectra

<sup>1</sup>H Spectrum of **Compound 3** in CHCl<sub>3</sub>

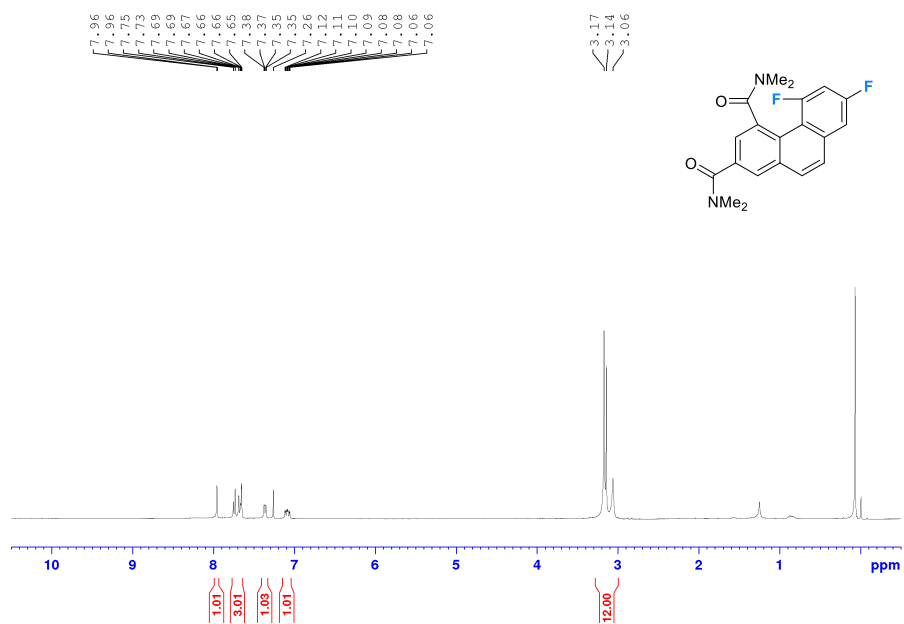

<sup>13</sup>C Spectrum of **Compound 3** in CHCl<sub>3</sub>



$^{19}\text{F}$  Spectrum of **Compound 3** in  $\text{CHCl}_3$

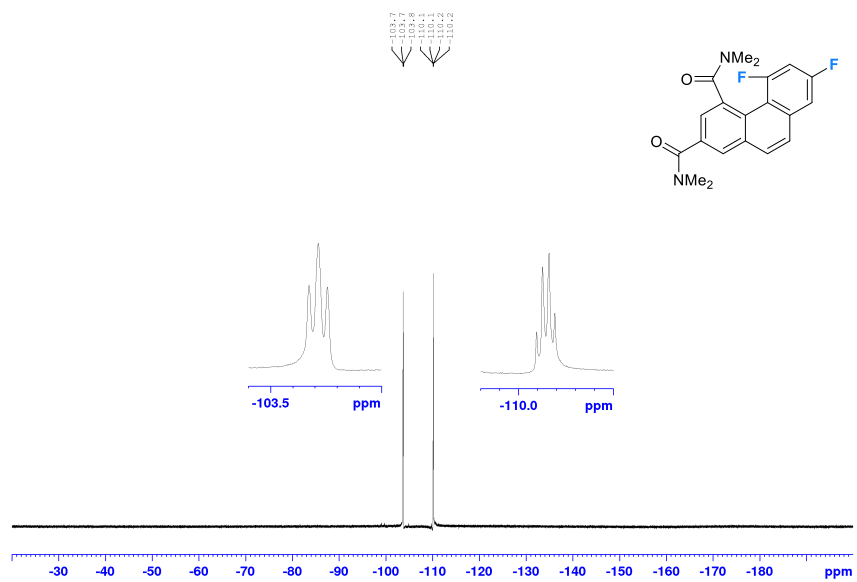





<sup>1</sup>H Spectrum of **Compound 4** in CHCl<sub>3</sub>

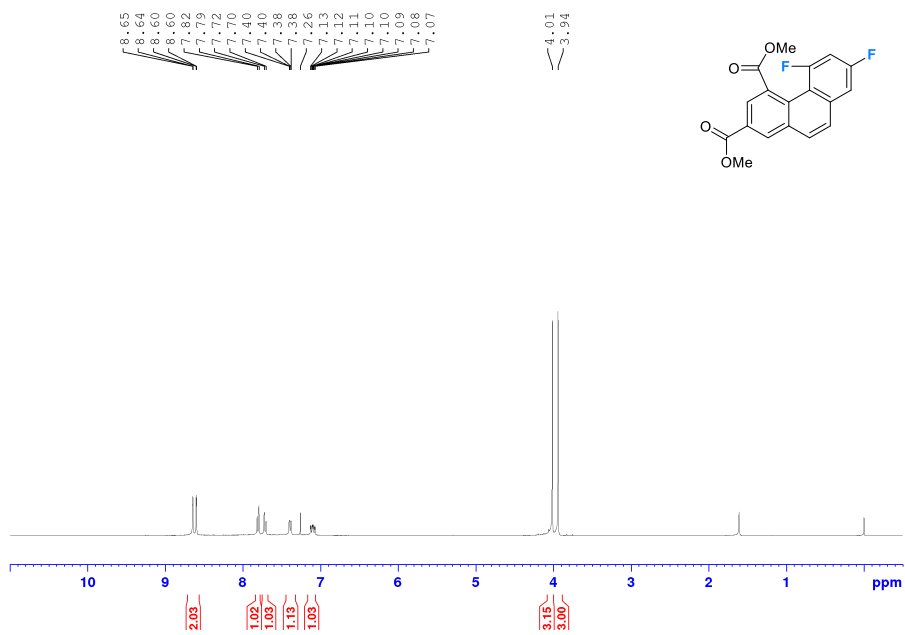

<sup>13</sup>C Spectrum of **Compound 4** in CHCl<sub>3</sub>

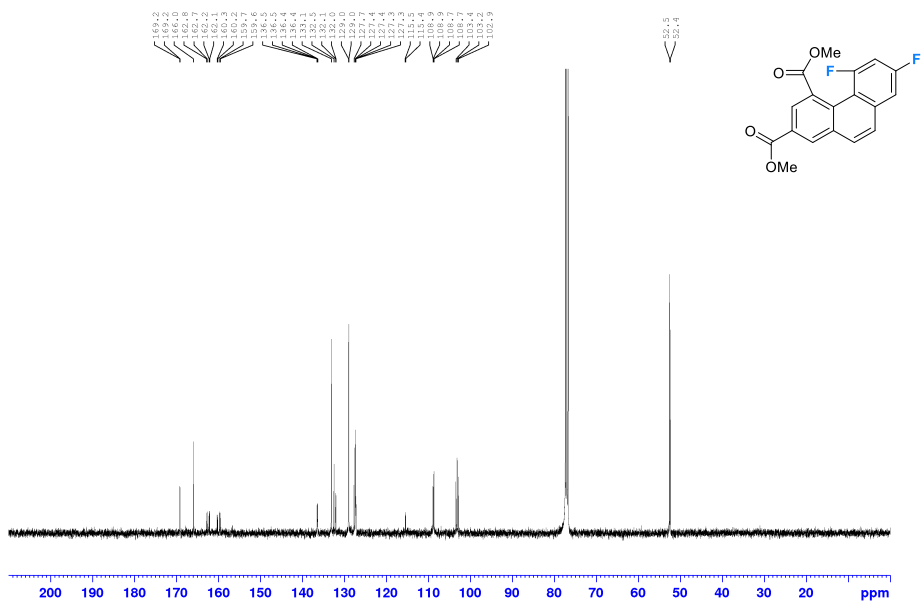

$^{19}\text{F}$  Spectrum of **Compound 4** in  $\text{CHCl}_3$

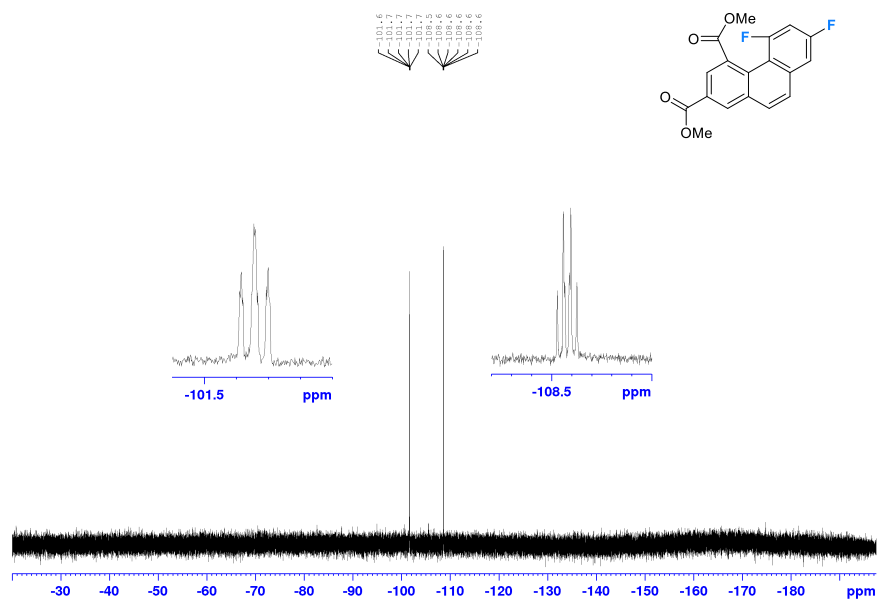

<sup>1</sup>H Spectrum of **Compound C** in CHCl<sub>3</sub>

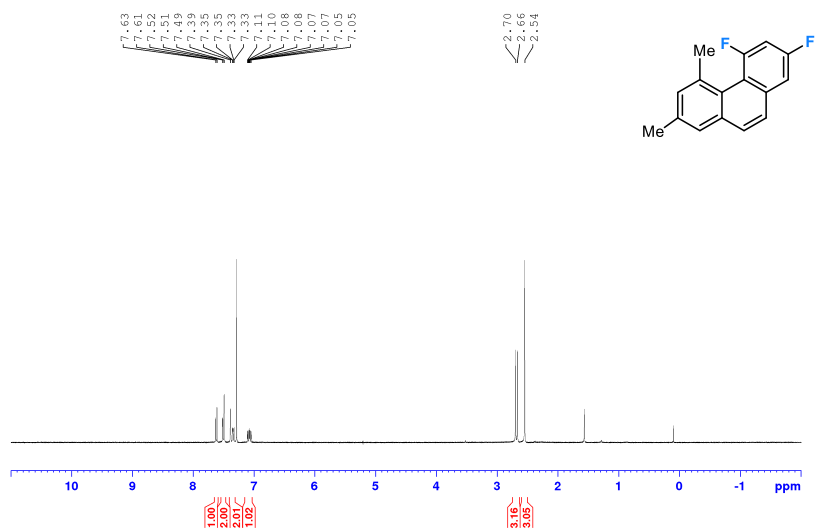

<sup>13</sup>C Spectrum of **Compound C** in CHCl<sub>3</sub>

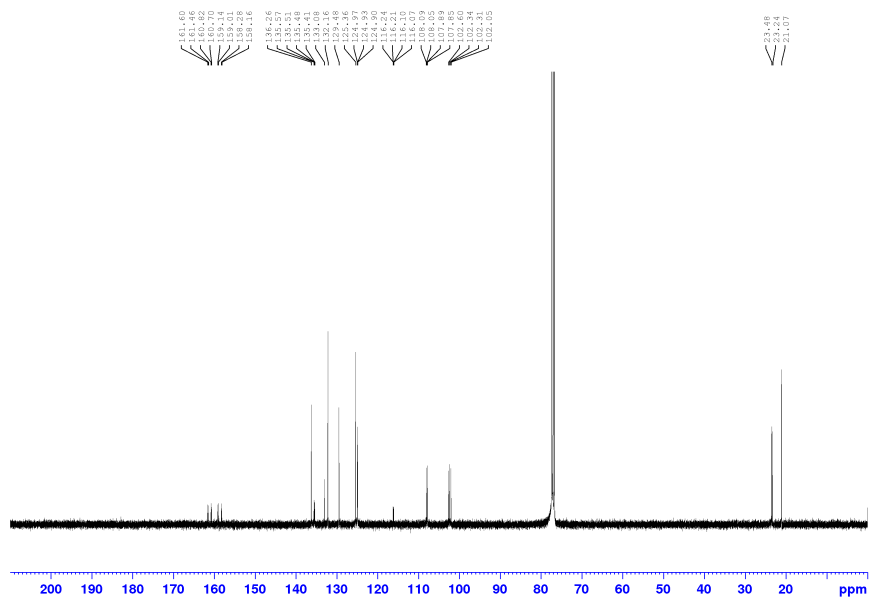

$^{19}\text{F}$  Spectrum of **Compound C** in  $\text{CHCl}_3$

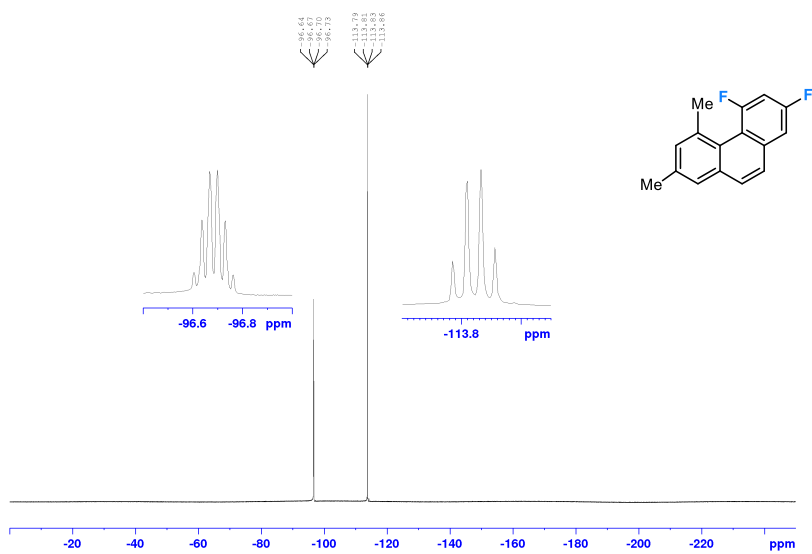

<sup>1</sup>H Spectrum of **Compound 6** in CHCl<sub>3</sub>

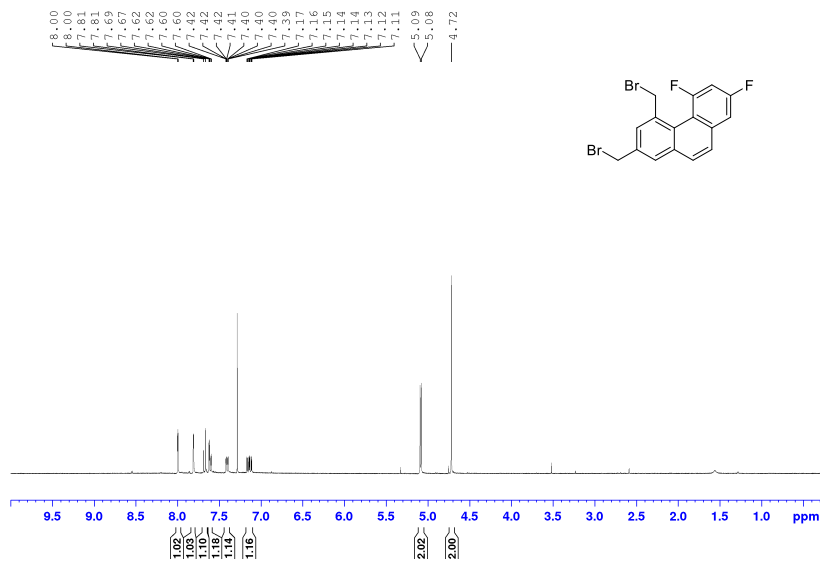

<sup>13</sup>C Spectrum of **Compound 6** in CHCl<sub>3</sub>

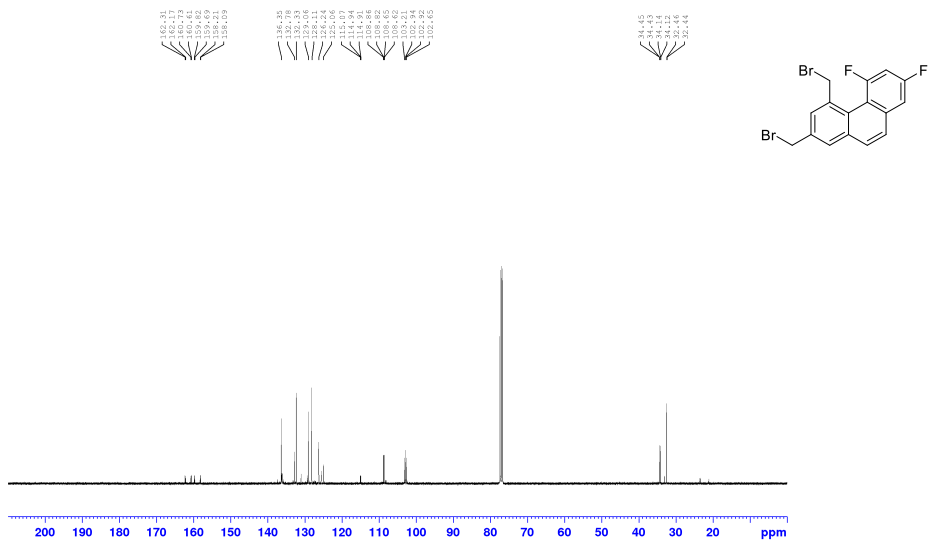

$^{19}\text{F}$  Spectrum of **Compound 6** in  $\text{CHCl}_3$

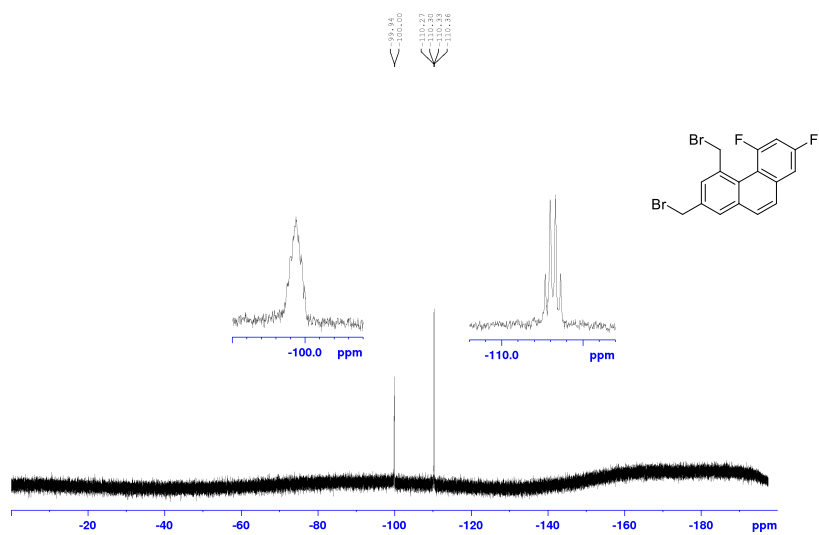

<sup>1</sup>H Spectrum of **Compound 7** in CHCl<sub>3</sub>

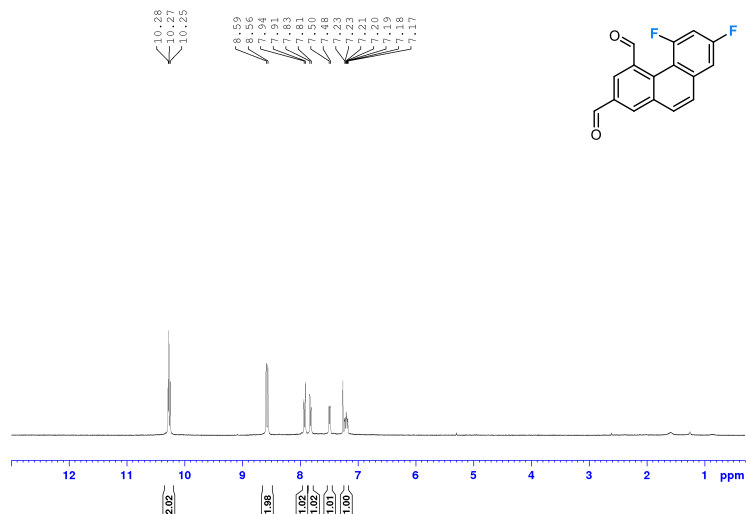

<sup>13</sup>C Spectrum of **Compound 7** in CHCl<sub>3</sub>

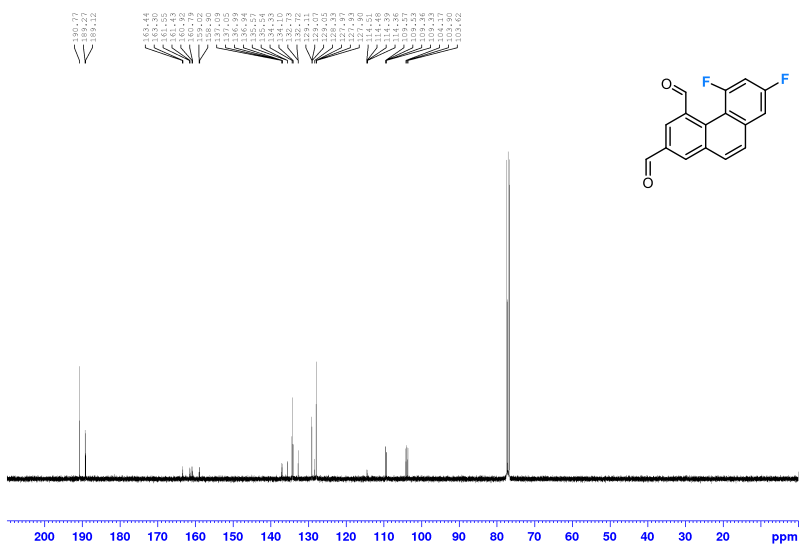





## UV-Vis and IR Spectra

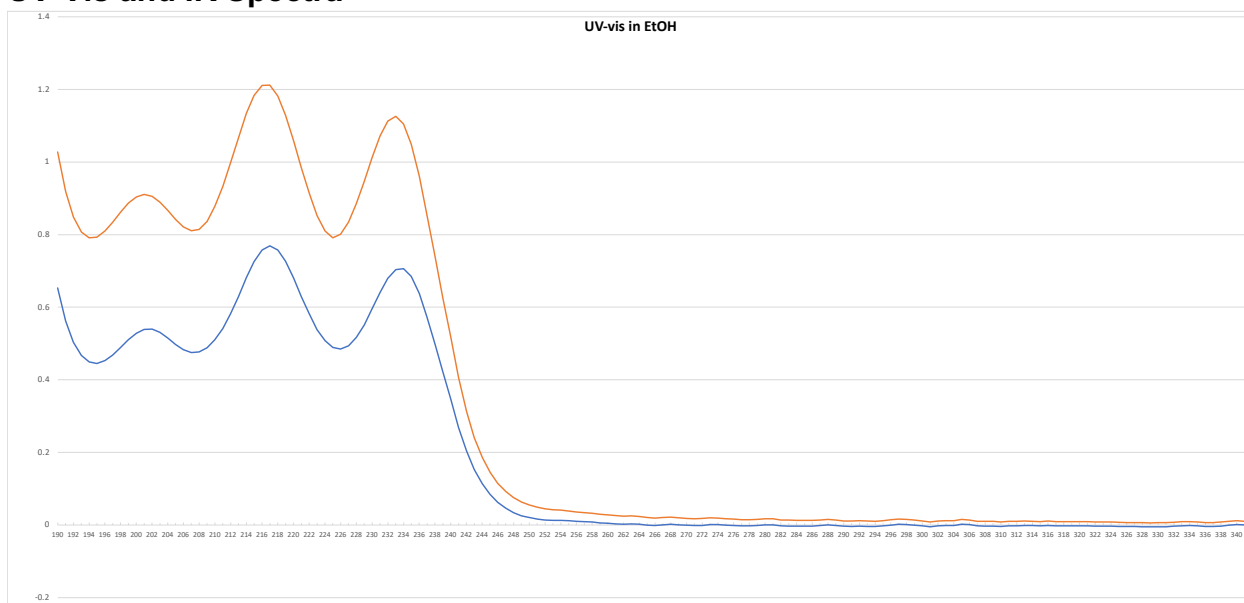

**Figure S3.** UV-Vis spectra of Compound **3** (blue) and Control diamide compound **8** (orange);  $\lambda_{max} = 204, 228, 239$ ; for **3** and  $\lambda_{max} = 204, 222, 234$  for **8**.

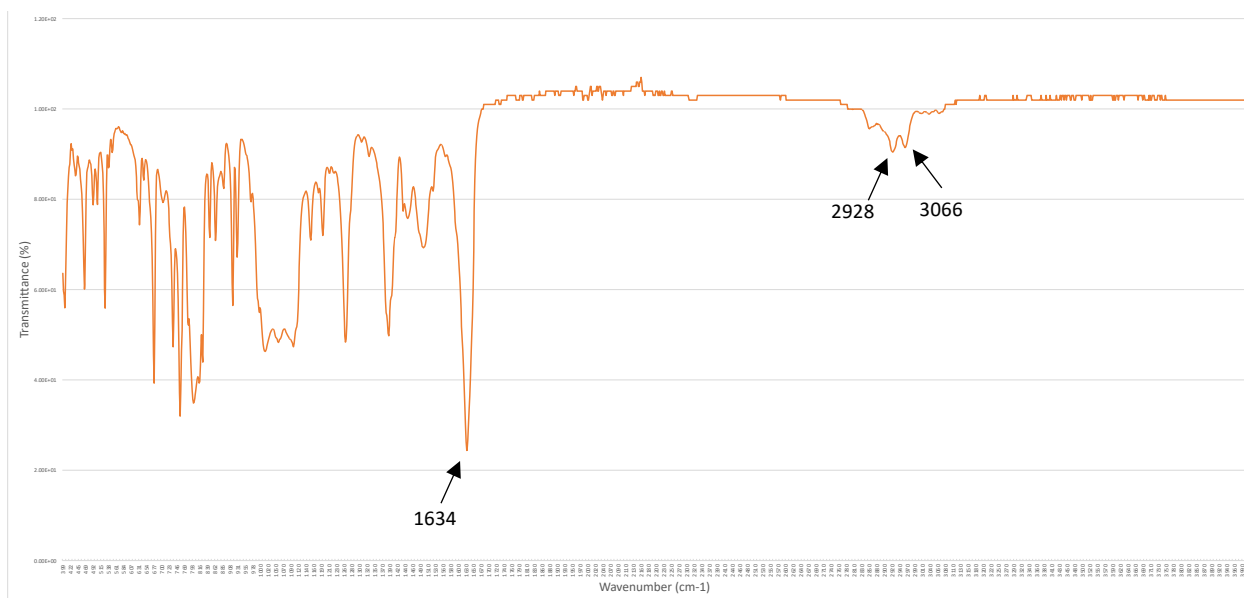

**Figure S4.** FTIR spectrum of control diamide compound **8**

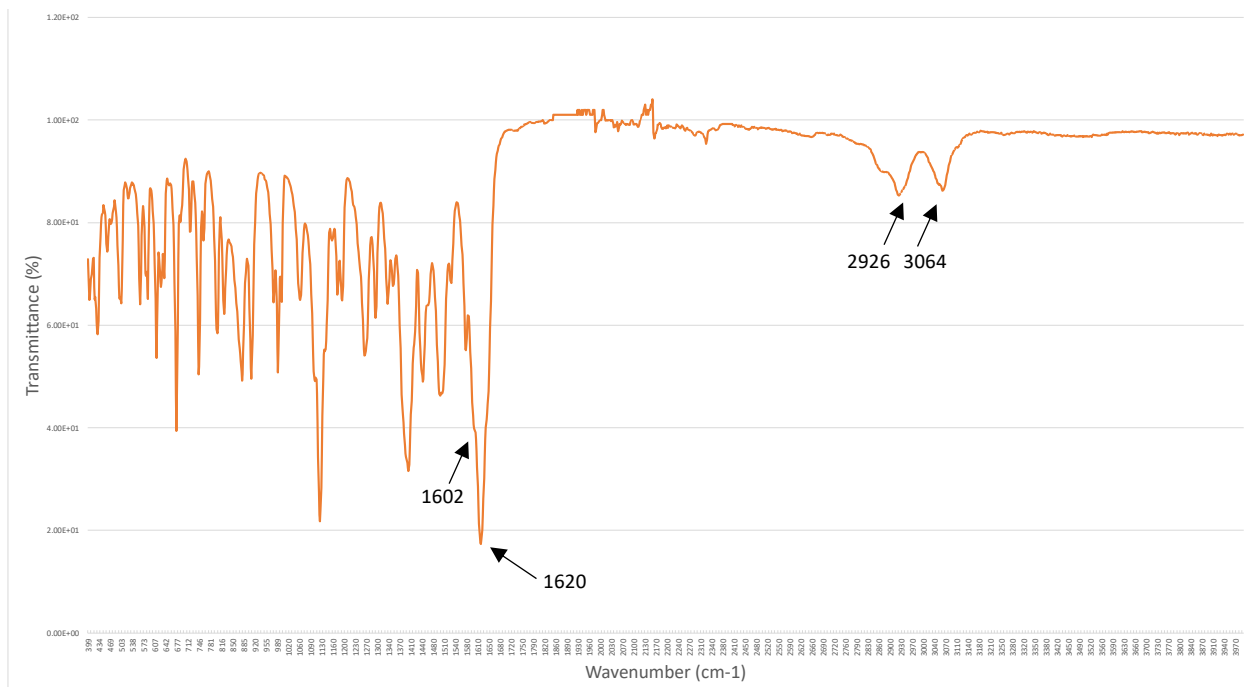

**Figure S5. FTIR spectrum of compound 3**

## HOESY Spectra

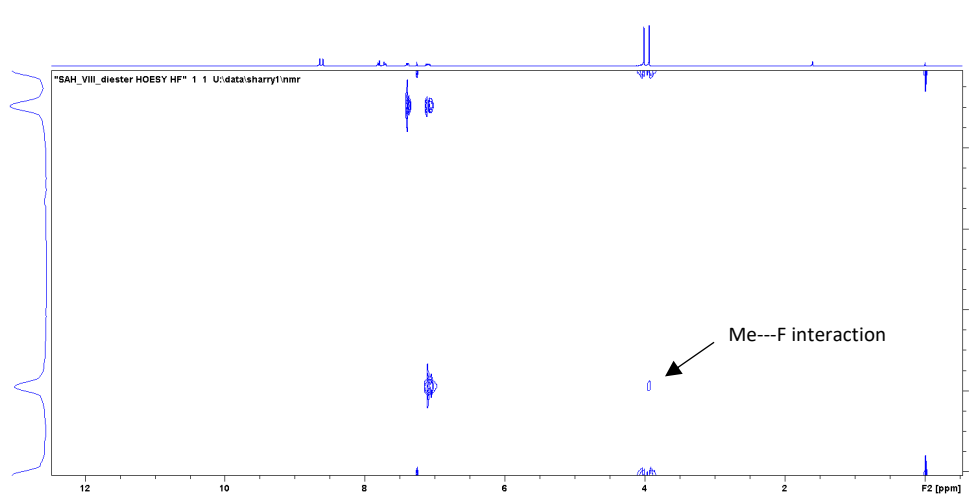

**Figure S6. HOESY spectrum of diester 4**

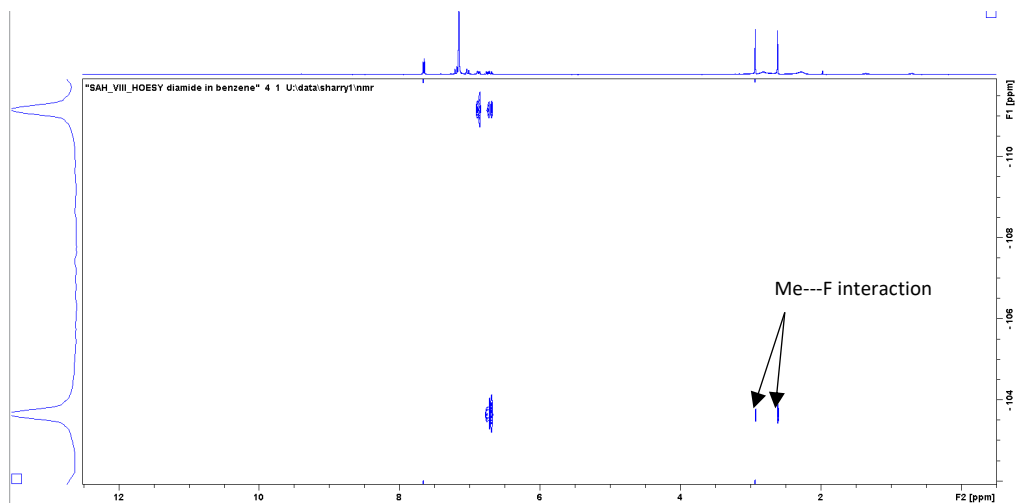

**Figure S7.** HOESY spectrum of diamide **3**

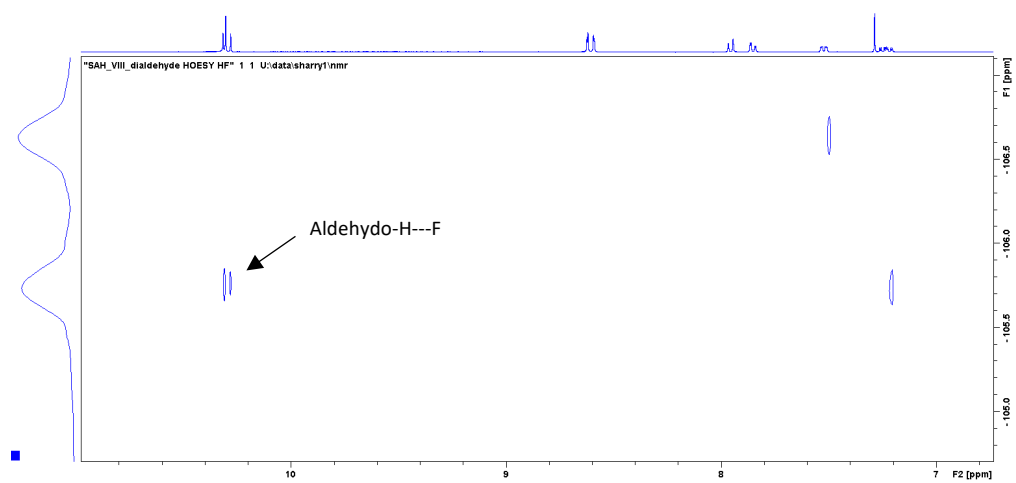

**Figure S8.** HOESY spectrum of dialdehyde **7**

## Lewis Acid ( $\text{BBr}_3$ ) Experiment NMR

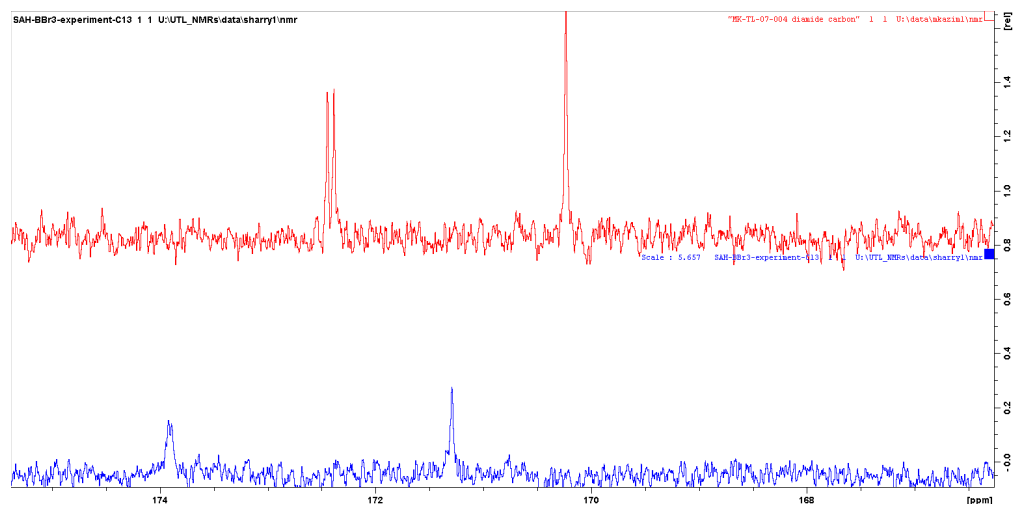

**Figure S9.** Zoomed carbonyl region of free diamide **3** (red) and  $\text{BBr}_3$  coordinated diamide  $\text{3-(BBr}_3)_2$  (blue) in their corresponding  $^{13}\text{C}$  NMR spectra.

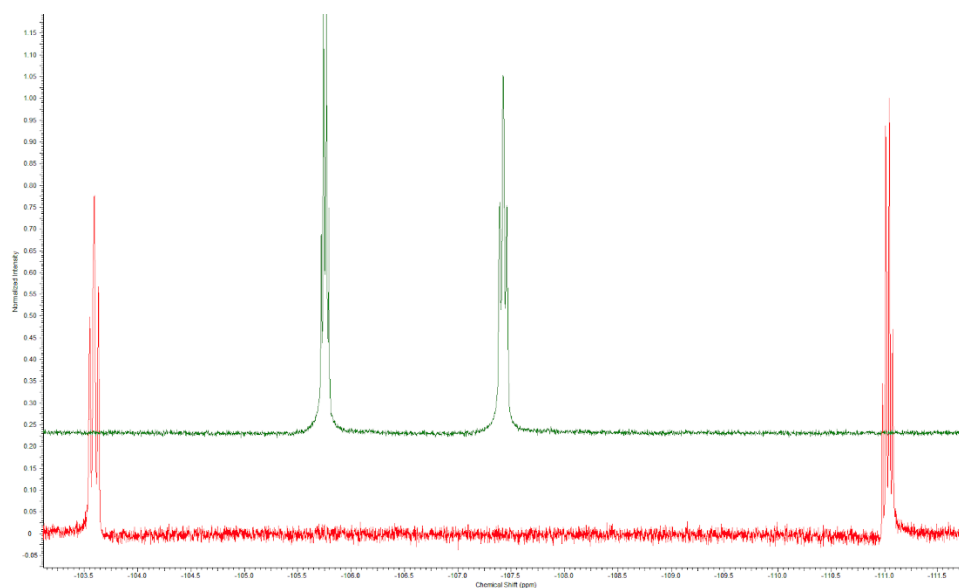

**Figure S10.**  $^{19}\text{F}$  NMR spectra of free diamide **3** (red) and  $\text{BBr}_3$  coordinated diamide  $\text{3-(BBr}_3)_2$  (green); Red: Probe F (-103.5 ppm), Control F (-111.0 ppm); Green: Probe F (-107.5 ppm), Control F (-105.7 ppm).

## Crystal Packing of the diamide **3** (Enantiomers)

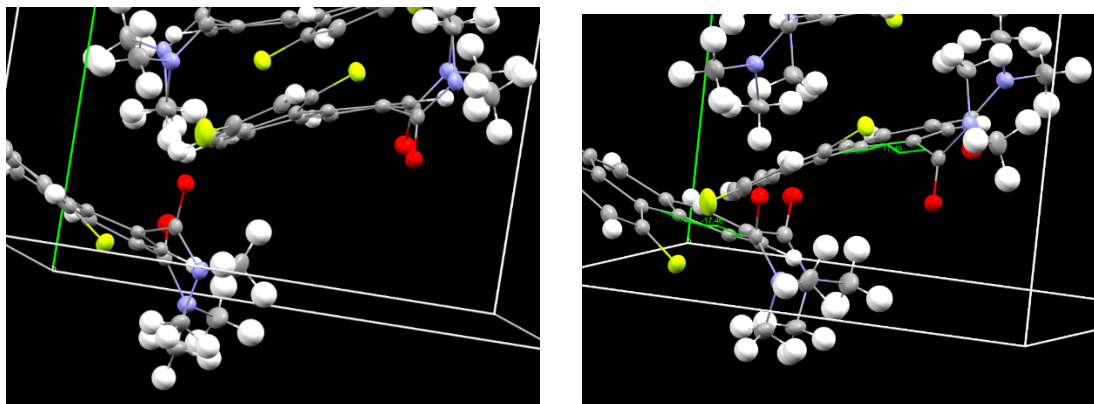

**Figure S11.** Zoomed image of the diamide **3** showing two enantiomers co-crystallizing in its crystallographic unit and the aromatic distortion in those enantiomers (17.46 degrees).

## Pyramidalization of the Probe Amide in Compound **3**

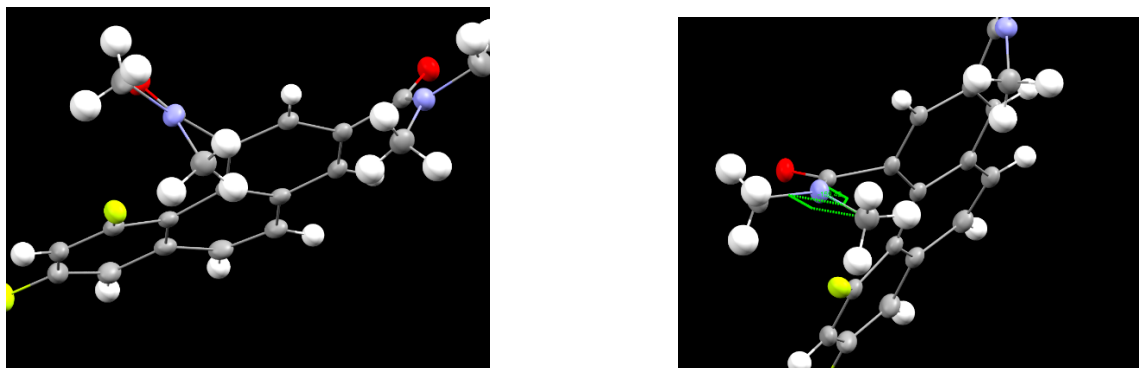

**Figure S12.** Zoomed image of the probe amide in compound **3** showing its pyramidalization and the angle of distortion (159.42 degrees).

## Amide Isomerization & Enantiomerization

**Line Shape Analysis for Amide Isomerization:** The line shape analyses were performed using the iNMR software program (MestreLab Research, Felician Barrera 9B-Bajo 15706 Santiago de Compostela Spain).

### Line Shape Analysis of 3 at 120 °C, $d_6$ -DMSO solvent

|                                                                                                                                                                                                                                                                                      |          |
|--------------------------------------------------------------------------------------------------------------------------------------------------------------------------------------------------------------------------------------------------------------------------------------|----------|
| $k = \kappa \frac{k_B T}{h} e^{-\frac{\Delta G^\ddagger}{RT}} \quad t_{1/2} = \ln(2)/k$                                                                                                                                                                                              |          |
| Eyring equation calculator calculates rate constant $k$ of reaction $A \rightarrow B$ and half life $t_{1/2}$ of A from activation free energy $\Delta G^\ddagger$ and transmission coefficient $\kappa$ . In the absence of other kinetic data it is possible to set $\kappa$ to 1. |          |
| activation free energy $\Delta G^\ddagger =$                                                                                                                                                                                                                                         |          |
| 74.615364                                                                                                                                                                                                                                                                            |          |
|                                                                                                                                                                                                                                                                                      | kJ/mol   |
| activation free energy $\Delta G^\ddagger =$                                                                                                                                                                                                                                         |          |
| 17.8335                                                                                                                                                                                                                                                                              |          |
|                                                                                                                                                                                                                                                                                      | kcal/mol |
| temperature $T =$                                                                                                                                                                                                                                                                    |          |
| 393.15                                                                                                                                                                                                                                                                               |          |
|                                                                                                                                                                                                                                                                                      | K        |
| transmission coefficient $\kappa =$                                                                                                                                                                                                                                                  |          |
| 1                                                                                                                                                                                                                                                                                    |          |
| rate constant $k =$                                                                                                                                                                                                                                                                  |          |
| 1.0000913053004322e+3                                                                                                                                                                                                                                                                |          |
|                                                                                                                                                                                                                                                                                      | 1/s      |
| half life $t_{1/2} =$                                                                                                                                                                                                                                                                |          |
| 693.06399326384                                                                                                                                                                                                                                                                      |          |
|                                                                                                                                                                                                                                                                                      | $\mu$ s  |

### Simulated Spectrum

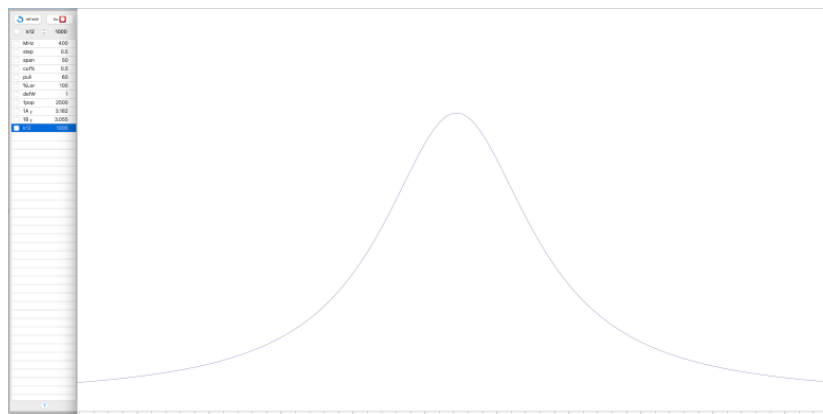

### Experimental Spectrum

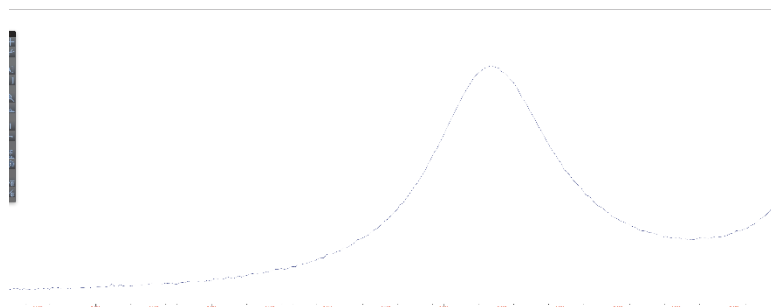

## Line Shape Analysis of 8 at 120 °C, d<sub>6</sub>-DMSO solvent

$$k = \kappa \frac{k_B T}{h} e^{-\frac{\Delta G^\ddagger}{RT}} \quad t_{1/2} = \ln(2)/k$$

Eyring equation calculator calculates rate constant  $k$  of reaction  $A \rightarrow B$  and half life  $t_{1/2}$  of A from activation free energy  $\Delta G^\ddagger$  and transmission coefficient  $\kappa$ . In the absence of other kinetic data it is possible to set  $\kappa$  to 1.

|                                              |                      |          |
|----------------------------------------------|----------------------|----------|
| activation free energy $\Delta G^\ddagger =$ | 91.02710400000001    | kJ/mol   |
| activation free energy $\Delta G^\ddagger =$ | 21.756               | kcal/mol |
| temperature $T =$                            | 393.15               | K        |
| transmission coefficient $\kappa =$          | 1                    |          |
| rate constant $k =$                          | 6.800657643282732e+0 | 1/s      |
| half life $t_{1/2} =$                        | 105.01183639865611   | ms       |

## Simulated Spectrum

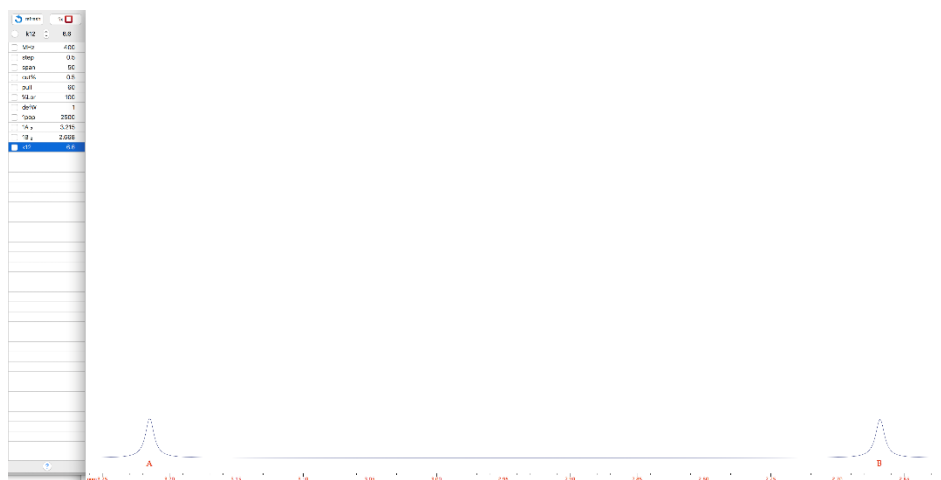

## Experimental Spectrum

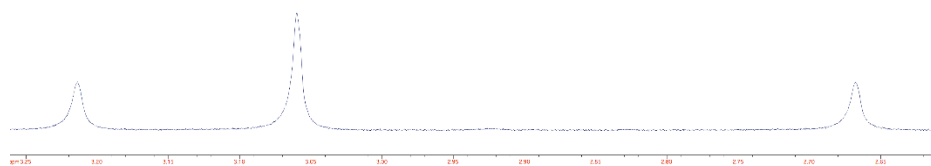

**Enantiomerization – Thermodynamic Analysis of 3 at 55 °C, CDCl<sub>3</sub> solvent**

≡ MENU

$$k = \kappa \frac{k_B T}{h} e^{-\frac{\Delta G^\ddagger}{RT}} \quad t_{1/2} = \ln(2)/k$$

Eyring equation calculator calculates rate constant  $k$  of reaction  $A \rightarrow B$  and half life  $t_{1/2}$  of  $A$  from activation free energy  $\Delta G^\ddagger$  and transmission coefficient  $\kappa$ . In the absence of other kinetic data it is possible to set  $\kappa$  to 1.

activation free energy  $\Delta G^\ddagger =$   
 71.69294 kJ/mol

activation free energy  $\Delta G^\ddagger =$   
 17.138 kcal/mol

temperature  $T =$   
 328.15 K

transmission coefficient  $\kappa =$   
 1

rate constant  $k =$   
 2.549198014637683e+1 1/s

half life  $t_{1/2} =$   
 26.194514437256496 ms

**Coalescence Temperature:** The coalescence temperature is defined as the temperature at which the appearance of the spectrum changes from that of two separate peaks to that of a single, flat-topped peak (see Figure 1C). At this temperature

$$k = \frac{\pi \Delta \nu_0}{\sqrt{2}} \quad (11)$$

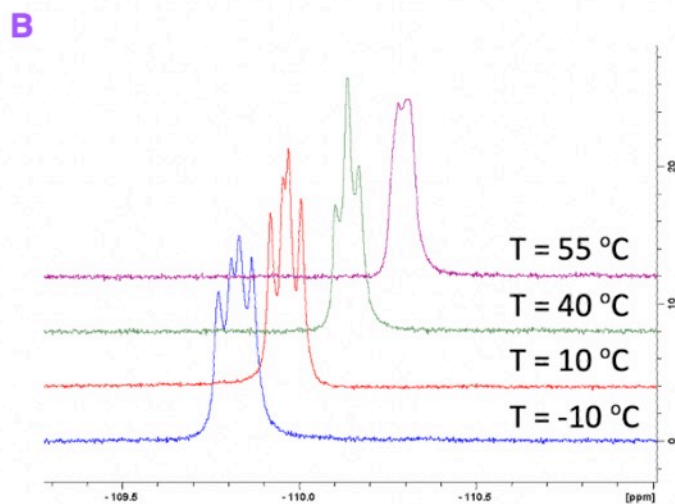



## Computational Work

The Gaussian '09 package and Spartan '10 were used for all geometry optimizations,<sup>9,10</sup> which were determined using the M06-2X/6-311++G\*\* level of theory. The calculated chemical shifts were fitted to the empirical equation at  $\omega$ B97XD/6-311++G\*\*  $\delta_{\text{calc}} = -1.183\delta + 261.3$ .<sup>11</sup>

**Protocol for transition state searches.** Transition states were found using a variety of DFT functionals; for consistency with the other parts of the paper M06-2X/6-311G\*\* is our basic benchmark. Vibrational analysis confirmed the presence of saddle points. Following the lead of Miller and Rablen,<sup>12</sup> activation energies were approximated as electronic and zero point; vibrational corrections are noted to be unreliable for our types of systems due to the anharmonicity of amide rotational barriers. In practice, we found this to be true; although the trends remained the same, the absolute values of energies varied widely when vibrations were taken into account.

|                       | <b>Aldehyde 7</b> | <b>Amide 3</b> | <b>Ester 4</b> | <b>Amide-(BBr<sub>3</sub>)<sub>2</sub></b> |
|-----------------------|-------------------|----------------|----------------|--------------------------------------------|
| <b>F – C coupling</b> | 19.3 Hz           | 7.2 Hz         | 2.9 Hz         | 3.2 Hz                                     |
| <b>Probe F</b>        | 89.12 ppm         | 81.41 ppm      | 75.85 ppm      | 85.75 ppm                                  |
| <b>Control F</b>      | 89.12 ppm         | 94.74 ppm      | 91.75 ppm      | 88.30 ppm                                  |

**Table S5.** DFT calculated ( $\omega$ B97XD/6-311++G\*\*) NMR chemical shifts of the probe and control fluorine atoms and the coupling constants between probe fluorine and carbonyl atoms in Aldehyde 7, Amide 3, and Ester 4.

|                  | <b>Amide 3</b> | <b>Amide-(BBr<sub>3</sub>)<sub>2</sub></b> |
|------------------|----------------|--------------------------------------------|
| <b>Probe F</b>   | -0.372 a.u.    | -0.353 a.u.                                |
| <b>Control F</b> | -0.354 a.u.    | -0.348 a.u.                                |

**Table S6.** DFT calculated (M06-2X/6-311++G\*\*) NBO charges on the probe and control fluorine atoms of free amide 3 and double BBr<sub>3</sub> coordinated amide.

<sup>9</sup> Gaussian 09, Revision A.1, M. J. Frisch, et al. Gaussian, Inc., Wallingford CT, 2009.

<sup>10</sup> Spartan '10 Program, Wavefunction Inc., Irvine, CA.

<sup>11</sup> Holl, M. G.; Struble, M. D.; Singal, P.; Siegler, M. A.; Lectka, T. *Angew. Chem. Int. Ed.* **2016**, *55*, 8266-8269.

<sup>12</sup> Barrett, K. T.; Metrano, A. J.; Rablen, P. R.; Miller, S. J. *Nature* 2014, *509*, 71-75.

|                                         | <b>Ground State</b> | <b>Transition State</b> |
|-----------------------------------------|---------------------|-------------------------|
| <b>Amide 3</b>                          | -1232.495976        | -1232.468156            |
| <b><math>\Delta E</math> (Hartree)</b>  | -0.02782            |                         |
| <b><math>\Delta E</math> (kcal/mol)</b> | <b>-17.45730038</b> |                         |
| <b>Control Amide 8</b>                  | -1034.024099        | -1033.991407            |
| <b><math>\Delta E</math> (Hartree)</b>  | -0.032692           |                         |
| <b><math>\Delta E</math> (kcal/mol)</b> | <b>-20.51452423</b> |                         |

**Table S7.** DFT calculated (M06-2X/6-311++G\*\*) barrier for amide isomerization in amide **3** and control amide **8**.

|            | <b>Energy (Hartree)</b> | <b><math>\Delta E</math> relative to 3 (Hartree)</b> | <b><math>\Delta E</math> relative to 3 (kcal/mol)</b> |
|------------|-------------------------|------------------------------------------------------|-------------------------------------------------------|
| <b>3</b>   | -1232.495976            | 0                                                    | 0                                                     |
| <b>TS1</b> | -1232.468156            | 0.02782                                              | 17.46                                                 |
| <b>3a</b>  | -1232.474763            | 0.021213                                             | 13.31                                                 |
| <b>TS2</b> | -1232.474712            | 0.021264                                             | 13.34                                                 |
| <b>3b</b>  | -1232.493625            | 0.002351                                             | 1.48                                                  |
| <b>TS3</b> | -1232.488613            | 0.007363                                             | 4.62                                                  |

**Table S8.** DFT calculated (M06-2X/6-311++G\*\*) energies for the structures in Figure 9.

|                                         | <b>Probe Amide Protonation</b> | <b>Control Amide Protonation</b> |
|-----------------------------------------|--------------------------------|----------------------------------|
| <b>Energy</b>                           | -1232.850589                   | -1232.846227                     |
| <b><math>\Delta E</math> (Hartree)</b>  | -0.004362                      |                                  |
| <b><math>\Delta E</math> (kcal/mol)</b> | <b>-2.737194258</b>            |                                  |

**Table S9.** DFT calculated (M06-2X/6-311++G\*\*) energies for the protonation of amide **3**.

## Coordinates of Calculated Structures

### Equilibrium Geometry of 3 at M06-2X/6-311++G\*\*

# opt=noeigentest 6-311++g(d,p) scrf=(iefpcm,solvent=chloroform) geom=connectivity m062x

---

| Center<br>Number | Atomic<br>Number | Atomic<br>Type | Coordinates (Angstroms) |           |           |
|------------------|------------------|----------------|-------------------------|-----------|-----------|
|                  |                  |                | X                       | Y         | Z         |
| 1                | 6                | 0              | -2.328237               | -1.011857 | 0.246211  |
| 2                | 1                | 0              | -1.931034               | -3.106970 | 0.067009  |
| 3                | 6                | 0              | -1.510896               | -2.108214 | 0.114997  |
| 4                | 6                | 0              | -0.377335               | 0.429529  | 0.357065  |
| 5                | 6                | 0              | -0.110593               | -1.964264 | 0.068029  |
| 6                | 6                | 0              | -1.749031               | 0.253681  | 0.404283  |
| 7                | 6                | 0              | 0.478625                | -0.675730 | 0.102408  |
| 8                | 6                | 0              | 0.719962                | -3.138000 | 0.071826  |
| 9                | 1                | 0              | -2.374880               | 1.113473  | 0.614709  |
| 10               | 6                | 0              | 2.064924                | -3.039318 | 0.125898  |
| 11               | 1                | 0              | 0.233145                | -4.107068 | 0.082169  |
| 12               | 1                | 0              | 2.686971                | -3.923951 | 0.189680  |
| 13               | 6                | 0              | 2.713130                | -1.760380 | 0.025361  |
| 14               | 6                | 0              | 4.117688                | -1.691117 | -0.054163 |
| 15               | 6                | 0              | 1.921765                | -0.586251 | -0.076935 |
| 16               | 6                | 0              | 4.751250                | -0.496170 | -0.300093 |
| 17               | 1                | 0              | 4.688812                | -2.606046 | 0.059197  |
| 18               | 6                | 0              | 3.988527                | 0.656334  | -0.527437 |
| 19               | 1                | 0              | 4.439704                | 1.600909  | -0.801279 |
| 20               | 6                | 0              | 2.623089                | 0.582138  | -0.433941 |
| 21               | 6                | 0              | 0.144418                | 1.744254  | 0.886256  |
| 22               | 8                | 0              | 0.881487                | 1.743472  | 1.853290  |
| 23               | 7                | 0              | -0.351567               | 2.891528  | 0.331766  |
| 24               | 9                | 0              | 1.930826                | 1.684115  | -0.787302 |
| 25               | 6                | 0              | 0.108496                | 4.144316  | 0.905536  |
| 26               | 1                | 0              | -0.614425               | 4.926137  | 0.666342  |
| 27               | 1                | 0              | 1.088143                | 4.425147  | 0.499399  |
| 28               | 1                | 0              | 0.197673                | 4.040173  | 1.983244  |
| 29               | 6                | 0              | -0.765953               | 2.973103  | -1.060057 |
| 30               | 1                | 0              | -1.669786               | 3.581100  | -1.144299 |
| 31               | 1                | 0              | -0.967633               | 1.984047  | -1.461500 |
| 32               | 1                | 0              | 0.024484                | 3.434076  | -1.661894 |
| 33               | 6                | 0              | -3.850010               | -1.170858 | 0.296597  |
| 34               | 8                | 0              | -4.355152               | -2.022455 | 1.026342  |
| 35               | 7                | 0              | -4.695144               | -0.317020 | -0.514007 |
| 36               | 6                | 0              | -4.090888               | 0.701977  | -1.386299 |
| 37               | 1                | 0              | -3.020090               | 0.499702  | -1.496413 |
| 38               | 1                | 0              | -4.230637               | 1.693968  | -0.940373 |
| 39               | 1                | 0              | -4.571963               | 0.673265  | -2.370167 |
| 40               | 6                | 0              | -6.157846               | -0.469836 | -0.466154 |
| 41               | 1                | 0              | -6.408219               | -1.488159 | -0.148256 |
| 42               | 1                | 0              | -6.577741               | -0.282817 | -1.460706 |
| 43               | 1                | 0              | -6.576469               | 0.248573  | 0.248548  |
| 44               | 9                | 0              | 6.130700                | -0.432480 | -0.377487 |

---

## Equilibrium Geometry for the NBO charge calculation of 3 at M06-2X/6-311++G\*\*

# opt=noeigentest freq 6-311++g(d,p) scrf=(iefpcm,solvent=chloroform) pop=(full,nbo) geom=connectivity m062x

| Center<br>Number | Atomic<br>Number | Atomic<br>Type | Coordinates (Angstroms) |           |           |
|------------------|------------------|----------------|-------------------------|-----------|-----------|
|                  |                  |                | X                       | Y         | Z         |
| 1                | 6                | 0              | -2.439742               | -0.304974 | -0.259451 |
| 2                | 6                | 0              | -1.824525               | -1.529454 | -0.356840 |
| 3                | 6                | 0              | -0.426353               | -1.647541 | -0.261383 |
| 4                | 6                | 0              | 0.385794                | -0.497618 | -0.106840 |
| 5                | 6                | 0              | -0.277466               | 0.742751  | 0.100706  |
| 6                | 6                | 0              | -1.650861               | 0.823522  | -0.009132 |
| 7                | 6                | 0              | 0.160488                | -2.957691 | -0.229595 |
| 8                | 6                | 0              | 1.832081                | -0.688743 | -0.122317 |
| 9                | 6                | 0              | 2.365382                | -1.996276 | 0.015561  |
| 10               | 6                | 0              | 1.480446                | -3.125790 | -0.022671 |
| 11               | 6                | 0              | 3.752226                | -2.215323 | 0.106820  |
| 12               | 1                | 0              | 4.145166                | -3.215791 | 0.237205  |
| 13               | 6                | 0              | 4.603028                | -1.151812 | -0.005306 |
| 14               | 6                | 0              | 4.141500                | 0.134259  | -0.265082 |
| 15               | 6                | 0              | 2.786527                | 0.323893  | -0.340008 |
| 16               | 1                | 0              | -0.496876               | -3.815551 | -0.323733 |
| 17               | 1                | 0              | -2.412975               | -2.430152 | -0.500521 |
| 18               | 1                | 0              | -2.140133               | 1.779918  | 0.137114  |
| 19               | 1                | 0              | 1.909053                | -4.117861 | 0.064425  |
| 20               | 1                | 0              | 4.824122                | 0.955550  | -0.435058 |
| 21               | 9                | 0              | 2.383395                | 1.547286  | -0.721680 |
| 22               | 9                | 0              | 5.927599                | -1.343751 | 0.082295  |
| 23               | 6                | 0              | 0.394851                | 1.937426  | 0.734970  |
| 24               | 6                | 0              | -3.915745               | -0.114163 | -0.464888 |
| 25               | 8                | 0              | 0.969155                | 1.790143  | 1.800288  |
| 26               | 7                | 0              | 0.203944                | 3.155174  | 0.156923  |
| 27               | 6                | 0              | 0.758028                | 4.312826  | 0.833146  |
| 28               | 1                | 0              | 1.799266                | 4.485306  | 0.534348  |
| 29               | 1                | 0              | 0.165611                | 5.193614  | 0.574433  |
| 30               | 1                | 0              | 0.729679                | 4.154378  | 1.909027  |
| 31               | 6                | 0              | -0.085302               | 3.340103  | -1.253666 |
| 32               | 1                | 0              | -0.898347               | 4.060739  | -1.381176 |
| 33               | 1                | 0              | 0.803386                | 3.717489  | -1.772391 |
| 34               | 1                | 0              | -0.377880               | 2.401137  | -1.716926 |
| 35               | 7                | 0              | -4.769627               | -0.934598 | 0.213919  |
| 36               | 6                | 0              | -4.430868               | -1.675664 | 1.416447  |
| 37               | 1                | 0              | -3.395917               | -1.505084 | 1.702000  |
| 38               | 1                | 0              | -5.071583               | -1.345446 | 2.241134  |
| 39               | 1                | 0              | -4.586348               | -2.749886 | 1.270066  |
| 40               | 6                | 0              | -6.189732               | -0.829082 | -0.068402 |
| 41               | 1                | 0              | -6.685901               | -0.157746 | 0.642449  |
| 42               | 1                | 0              | -6.331201               | -0.435140 | -1.072212 |
| 43               | 1                | 0              | -6.645564               | -1.819586 | 0.008528  |
| 44               | 8                | 0              | -4.305565               | 0.732904  | -1.251859 |

## Equilibrium Geometry for the NMR calculations of 3 at $\omega$ B97XD/6-311++G\*\*

# nmr=(giao,spinspin) wb97xd/6-311++g(d,p) scrf=(iefpcm,solvent=dichloromethane) geom=connectivity

---

| Center<br>Number | Atomic<br>Number | Atomic<br>Type | Coordinates (Angstroms) |           |           |
|------------------|------------------|----------------|-------------------------|-----------|-----------|
|                  |                  |                | X                       | Y         | Z         |
| 1                | 6                | 0              | -2.445288               | -0.277156 | -0.229994 |
| 2                | 6                | 0              | -1.846810               | -1.513474 | -0.310869 |
| 3                | 6                | 0              | -0.447895               | -1.646004 | -0.221630 |
| 4                | 6                | 0              | 0.375534                | -0.500906 | -0.081858 |
| 5                | 6                | 0              | -0.271779               | 0.749395  | 0.117440  |
| 6                | 6                | 0              | -1.644635               | 0.849331  | 0.006211  |
| 7                | 6                | 0              | 0.129397                | -2.962576 | -0.187696 |
| 8                | 6                | 0              | 1.819013                | -0.701791 | -0.110262 |
| 9                | 6                | 0              | 2.346494                | -2.013223 | 0.021284  |
| 10               | 6                | 0              | 1.453622                | -3.138724 | 0.001794  |
| 11               | 6                | 0              | 3.735300                | -2.238074 | 0.087714  |
| 12               | 1                | 0              | 4.127965                | -3.239518 | 0.210367  |
| 13               | 6                | 0              | 4.584808                | -1.174525 | -0.041479 |
| 14               | 6                | 0              | 4.128010                | 0.116760  | -0.294204 |
| 15               | 6                | 0              | 2.771606                | 0.309876  | -0.343323 |
| 16               | 1                | 0              | -0.536266               | -3.814580 | -0.268877 |
| 17               | 1                | 0              | -2.446543               | -2.408641 | -0.441918 |
| 18               | 1                | 0              | -2.122306               | 1.813536  | 0.144524  |
| 19               | 1                | 0              | 1.877893                | -4.132234 | 0.088612  |
| 20               | 1                | 0              | 4.811893                | 0.933927  | -0.479493 |
| 21               | 9                | 0              | 2.358137                | 1.533879  | -0.716186 |
| 22               | 9                | 0              | 5.911768                | -1.370743 | 0.022963  |
| 23               | 6                | 0              | 0.427575                | 1.933281  | 0.741517  |
| 24               | 6                | 0              | -3.918814               | -0.071781 | -0.443040 |
| 25               | 8                | 0              | 1.031411                | 1.770005  | 1.793676  |
| 26               | 7                | 0              | 0.245111                | 3.150841  | 0.176098  |
| 27               | 6                | 0              | 0.851252                | 4.295510  | 0.838769  |
| 28               | 1                | 0              | 1.909071                | 4.387028  | 0.567941  |
| 29               | 1                | 0              | 0.324185                | 5.197936  | 0.527529  |
| 30               | 1                | 0              | 0.773454                | 4.179118  | 1.916893  |
| 31               | 6                | 0              | -0.048744               | 3.343862  | -1.237269 |
| 32               | 1                | 0              | -0.838139               | 4.089198  | -1.355203 |
| 33               | 1                | 0              | 0.850505                | 3.695915  | -1.753301 |
| 34               | 1                | 0              | -0.368535               | 2.413064  | -1.697471 |
| 35               | 7                | 0              | -4.782321               | -0.912232 | 0.177724  |
| 36               | 6                | 0              | -4.474132               | -1.714812 | 1.355102  |
| 37               | 1                | 0              | -3.464533               | -1.521092 | 1.705872  |
| 38               | 1                | 0              | -5.171683               | -1.450494 | 2.154256  |
| 39               | 1                | 0              | -4.583952               | -2.780650 | 1.137434  |
| 40               | 6                | 0              | -6.199629               | -0.793010 | -0.134294 |
| 41               | 1                | 0              | -6.689121               | -0.078090 | 0.534746  |
| 42               | 1                | 0              | -6.320113               | -0.455135 | -1.160233 |
| 43               | 1                | 0              | -6.667351               | -1.770820 | -0.010939 |
| 44               | 8                | 0              | -4.291963               | 0.816406  | -1.201423 |

---

## Equilibrium Geometry of 4 at M06-2X/6-311++G\*\*

# opt 6-311++g(d,p) scrf=(iefpcm,solvent=chloroform) geom=connectivity m062x

---

| Center<br>Number | Atomic<br>Number | Atomic<br>Type | Coordinates (Angstroms) |           |           |
|------------------|------------------|----------------|-------------------------|-----------|-----------|
|                  |                  |                | X                       | Y         | Z         |
| 1                | 6                | 0              | -2.623081               | -0.348667 | -0.063872 |
| 2                | 6                | 0              | -1.963641               | -1.554096 | 0.014002  |
| 3                | 6                | 0              | -0.558013               | -1.600998 | 0.064679  |
| 4                | 6                | 0              | 0.204303                | -0.409308 | -0.015694 |
| 5                | 6                | 0              | -0.505415               | 0.823513  | 0.023077  |
| 6                | 6                | 0              | -1.884003               | 0.842472  | -0.019568 |
| 7                | 6                | 0              | 0.093196                | -2.864843 | 0.274599  |
| 8                | 6                | 0              | 1.651680                | -0.537504 | -0.086376 |
| 9                | 6                | 0              | 2.259337                | -1.785340 | 0.212489  |
| 10               | 6                | 0              | 1.432884                | -2.942821 | 0.415748  |
| 11               | 6                | 0              | 3.660274                | -1.923304 | 0.235491  |
| 12               | 1                | 0              | 4.117980                | -2.871577 | 0.487368  |
| 13               | 6                | 0              | 4.437438                | -0.848854 | -0.099705 |
| 14               | 6                | 0              | 3.894221                | 0.365321  | -0.516162 |
| 15               | 6                | 0              | 2.529075                | 0.477525  | -0.515324 |
| 16               | 1                | 0              | -0.526417               | -3.749950 | 0.363778  |
| 17               | 1                | 0              | -2.523985               | -2.480504 | 0.052113  |
| 18               | 1                | 0              | -2.422209               | 1.781958  | 0.036981  |
| 19               | 1                | 0              | 1.917104                | -3.887876 | 0.631692  |
| 20               | 1                | 0              | 4.518317                | 1.179578  | -0.859001 |
| 21               | 9                | 0              | 2.018357                | 1.609536  | -1.033455 |
| 22               | 9                | 0              | 5.773331                | -0.965007 | -0.082742 |
| 23               | 6                | 0              | 0.141321                | 2.121669  | 0.425043  |
| 24               | 6                | 0              | -4.109403               | -0.252273 | -0.130825 |
| 25               | 8                | 0              | 0.786352                | 2.208476  | 1.434944  |
| 26               | 6                | 0              | -0.105937               | 4.517401  | 0.305901  |
| 27               | 1                | 0              | 0.886970                | 4.961359  | 0.238404  |
| 28               | 1                | 0              | -0.813661               | 5.111533  | -0.267060 |
| 29               | 1                | 0              | -0.425571               | 4.465996  | 1.346010  |
| 30               | 6                | 0              | -6.132917               | -1.434789 | -0.185687 |
| 31               | 1                | 0              | -6.544291               | -0.900579 | 0.670235  |
| 32               | 1                | 0              | -6.458626               | -0.954307 | -1.107865 |
| 33               | 1                | 0              | -6.435235               | -2.477737 | -0.168570 |
| 34               | 8                | 0              | -4.711401               | 0.790653  | -0.195734 |
| 35               | 8                | 0              | -4.701307               | -1.446597 | -0.116617 |
| 36               | 8                | 0              | -0.116580               | 3.216310  | -0.298244 |

---

## Equilibrium Geometry for NMR calculations of 4 at $\omega$ B97XD/6-311++G\*\*

# nmr=(giao,spinspin) wb97xd/6-311++g(d,p) scrf=(iefpcm,solvent=chloroform) geom=connectivity

---

| Center<br>Number | Atomic<br>Number | Atomic<br>Type | Coordinates (Angstroms) |           |           |
|------------------|------------------|----------------|-------------------------|-----------|-----------|
|                  |                  |                | X                       | Y         | Z         |
| 1                | 6                | 0              | -2.642040               | -0.301821 | -0.037498 |
| 2                | 6                | 0              | -2.000704               | -1.516539 | 0.058578  |
| 3                | 6                | 0              | -0.596263               | -1.582845 | 0.124911  |

---

|    |   |   |           |           |           |
|----|---|---|-----------|-----------|-----------|
| 4  | 6 | 0 | 0.178873  | -0.400185 | 0.052138  |
| 5  | 6 | 0 | -0.514197 | 0.840994  | 0.108684  |
| 6  | 6 | 0 | -1.890213 | 0.881630  | 0.027685  |
| 7  | 6 | 0 | 0.044015  | -2.853306 | 0.330409  |
| 8  | 6 | 0 | 1.621486  | -0.544494 | -0.054867 |
| 9  | 6 | 0 | 2.221191  | -1.797503 | 0.234354  |
| 10 | 6 | 0 | 1.384776  | -2.944665 | 0.458736  |
| 11 | 6 | 0 | 3.620951  | -1.952371 | 0.214894  |
| 12 | 1 | 0 | 4.076305  | -2.903686 | 0.458863  |
| 13 | 6 | 0 | 4.398121  | -0.891190 | -0.159262 |
| 14 | 6 | 0 | 3.856178  | 0.323616  | -0.576730 |
| 15 | 6 | 0 | 2.493101  | 0.453959  | -0.534560 |
| 16 | 1 | 0 | -0.583376 | -3.732925 | 0.419276  |
| 17 | 1 | 0 | -2.574348 | -2.435066 | 0.090483  |
| 18 | 1 | 0 | -2.407428 | 1.832630  | 0.060044  |
| 19 | 1 | 0 | 1.861996  | -3.894964 | 0.667460  |
| 20 | 1 | 0 | 4.480279  | 1.121933  | -0.954682 |
| 21 | 9 | 0 | 1.978389  | 1.578010  | -1.062913 |
| 22 | 9 | 0 | 5.733229  | -1.022878 | -0.185976 |
| 23 | 6 | 0 | 0.167982  | 2.110158  | 0.513769  |
| 24 | 6 | 0 | -4.125081 | -0.189084 | -0.137528 |
| 25 | 8 | 0 | 0.985115  | 2.172479  | 1.397156  |
| 26 | 6 | 0 | 0.276290  | 4.429427  | 0.227838  |
| 27 | 1 | 0 | 1.356090  | 4.411133  | 0.080702  |
| 28 | 1 | 0 | -0.187688 | 5.166085  | -0.421440 |
| 29 | 1 | 0 | 0.053119  | 4.641563  | 1.273218  |
| 30 | 6 | 0 | -6.156636 | -1.350658 | -0.282820 |
| 31 | 1 | 0 | -6.585245 | -0.846793 | 0.583130  |
| 32 | 1 | 0 | -6.456150 | -0.830602 | -1.192344 |
| 33 | 1 | 0 | -6.468549 | -2.390520 | -0.314582 |
| 34 | 8 | 0 | -4.718767 | 0.859649  | -0.179794 |
| 35 | 8 | 0 | -4.727769 | -1.378551 | -0.179694 |
| 36 | 8 | 0 | -0.288148 | 3.168206  | -0.152982 |

### Equilibrium Geometry of 7 at M06-2X/6-311++G\*\*

# opt 6-311++g(d,p) scrf=(iefpcm,solvent=chloroform) geom=connectivity m062x

| Center Number | Atomic Number | Atomic Type | Coordinates (Angstroms) |           |           |
|---------------|---------------|-------------|-------------------------|-----------|-----------|
|               |               |             | X                       | Y         | Z         |
| 1             | 6             | 0           | -3.162514               | -0.561029 | -0.139956 |
| 2             | 6             | 0           | -2.331890               | -1.661972 | -0.128735 |
| 3             | 6             | 0           | -0.937506               | -1.516890 | -0.007547 |
| 4             | 6             | 0           | -0.370406               | -0.220584 | 0.050631  |
| 5             | 6             | 0           | -1.255117               | 0.888500  | 0.195313  |
| 6             | 6             | 0           | -2.617796               | 0.715179  | 0.070750  |
| 7             | 6             | 0           | -0.100951               | -2.678122 | 0.123831  |
| 8             | 6             | 0           | 1.077429                | -0.116475 | -0.008313 |
| 9             | 6             | 0           | 1.871179                | -1.274723 | 0.207931  |
| 10            | 6             | 0           | 1.231827                | -2.557912 | 0.306265  |
| 11            | 6             | 0           | 3.276108                | -1.193261 | 0.231796  |
| 12            | 1             | 0           | 3.878242                | -2.072363 | 0.423153  |
| 13            | 6             | 0           | 3.874675                | 0.008109  | -0.034913 |
| 14            | 6             | 0           | 3.148946                | 1.146166  | -0.383965 |

|    |   |   |           |           |           |
|----|---|---|-----------|-----------|-----------|
| 15 | 6 | 0 | 1.782152  | 1.047145  | -0.380757 |
| 16 | 1 | 0 | -0.573196 | -3.653892 | 0.115793  |
| 17 | 1 | 0 | -2.751885 | -2.661145 | -0.201676 |
| 18 | 1 | 0 | -3.277545 | 1.567022  | 0.192947  |
| 19 | 1 | 0 | 1.854219  | -3.431091 | 0.462556  |
| 20 | 1 | 0 | 3.640449  | 2.062519  | -0.681811 |
| 21 | 9 | 0 | 1.098399  | 2.111958  | -0.836807 |
| 22 | 9 | 0 | 5.211590  | 0.099914  | -0.017899 |
| 23 | 6 | 0 | -0.808229 | 2.204927  | 0.741544  |
| 24 | 6 | 0 | -4.626011 | -0.746482 | -0.279520 |
| 25 | 8 | 0 | -1.458025 | 3.215737  | 0.658375  |
| 26 | 8 | 0 | -5.422283 | 0.158841  | -0.275623 |
| 27 | 1 | 0 | 0.128821  | 2.185226  | 1.323876  |
| 28 | 1 | 0 | -4.957909 | -1.795205 | -0.390628 |

---

### Equilibrium Geometry for NMR calculations of 7 at $\omega$ B97XD/6-311++G\*\*

# nmr=(giao,spinspin) wb97xd/6-311++g(d,p) scrf=(iefpcm,solvent=dichloromethane) geom=connectivity

---

| Center<br>Number | Atomic<br>Number | Atomic<br>Type | Coordinates (Angstroms) |           |           |
|------------------|------------------|----------------|-------------------------|-----------|-----------|
|                  |                  |                | X                       | Y         | Z         |
| 1                | 6                | 0              | -3.163531               | -0.560889 | -0.137634 |
| 2                | 6                | 0              | -2.332808               | -1.661704 | -0.129271 |
| 3                | 6                | 0              | -0.938266               | -1.516751 | -0.009524 |
| 4                | 6                | 0              | -0.370855               | -0.220539 | 0.050187  |
| 5                | 6                | 0              | -1.255771               | 0.888127  | 0.197259  |
| 6                | 6                | 0              | -2.618509               | 0.715106  | 0.073606  |
| 7                | 6                | 0              | -0.101979               | -2.678427 | 0.119089  |
| 8                | 6                | 0              | 1.077176                | -0.116729 | -0.008173 |
| 9                | 6                | 0              | 1.870524                | -1.275805 | 0.205662  |
| 10               | 6                | 0              | 1.230872                | -2.558997 | 0.301209  |
| 11               | 6                | 0              | 3.275474                | -1.195083 | 0.230236  |
| 12               | 1                | 0              | 3.877097                | -2.074944 | 0.419697  |
| 13               | 6                | 0              | 3.874793                | 0.006596  | -0.033211 |
| 14               | 6                | 0              | 3.149723                | 1.145845  | -0.379533 |
| 15               | 6                | 0              | 1.782865                | 1.047465  | -0.377131 |
| 16               | 1                | 0              | -0.574519               | -3.654040 | 0.109421  |
| 17               | 1                | 0              | -2.752859               | -2.660791 | -0.203055 |
| 18               | 1                | 0              | -3.278088               | 1.566991  | 0.196436  |
| 19               | 1                | 0              | 1.853047                | -3.432691 | 0.455480  |
| 20               | 1                | 0              | 3.641700                | 2.062774  | -0.674792 |
| 21               | 9                | 0              | 1.100203                | 2.113982  | -0.830706 |
| 22               | 9                | 0              | 5.211759                | 0.097636  | -0.015498 |
| 23               | 6                | 0              | -0.808609               | 2.206004  | 0.739464  |
| 24               | 6                | 0              | -4.627143               | -0.746229 | -0.275830 |
| 25               | 8                | 0              | -1.451623               | 3.219687  | 0.640975  |
| 26               | 8                | 0              | -5.423515               | 0.159008  | -0.269608 |
| 27               | 1                | 0              | 0.122408                | 2.185454  | 1.331481  |
| 28               | 1                | 0              | -4.959065               | -1.794810 | -0.388204 |

---



## Equilibrium Geometry of Amide-(BBr<sub>3</sub>)<sub>2</sub> at M06-2X/6-311++G\*\*

# opt=noeigentest 6-311++g(d,p) scrf=(iefpcm,solvent=chloroform) geom=connectivity m062x

| Center<br>Number | Atomic<br>Number | Atomic<br>Type | Coordinates (Angstroms) |           |           |
|------------------|------------------|----------------|-------------------------|-----------|-----------|
|                  |                  |                | X                       | Y         | Z         |
| 1                | 6                | 0              | -1.335252               | -0.008535 | -1.015747 |
| 2                | 6                | 0              | -0.985274               | 1.066943  | -1.797309 |
| 3                | 6                | 0              | 0.161249                | 1.823857  | -1.499841 |
| 4                | 6                | 0              | 0.929550                | 1.547465  | -0.341556 |
| 5                | 6                | 0              | 0.568607                | 0.389517  | 0.403208  |
| 6                | 6                | 0              | -0.536253               | -0.369658 | 0.071824  |
| 7                | 6                | 0              | 0.596359                | 2.811092  | -2.446914 |
| 8                | 6                | 0              | 2.067388                | 2.411577  | -0.063640 |
| 9                | 6                | 0              | 2.531314                | 3.293544  | -1.076367 |
| 10               | 6                | 0              | 1.768020                | 3.457382  | -2.280935 |
| 11               | 6                | 0              | 3.689130                | 4.070862  | -0.891334 |
| 12               | 1                | 0              | 4.045929                | 4.724758  | -1.676770 |
| 13               | 6                | 0              | 4.342183                | 4.013675  | 0.308944  |
| 14               | 6                | 0              | 3.873097                | 3.250948  | 1.376151  |
| 15               | 6                | 0              | 2.751165                | 2.495490  | 1.164636  |
| 16               | 1                | 0              | -0.014164               | 2.981403  | -3.325815 |
| 17               | 1                | 0              | -1.573231               | 1.326700  | -2.671187 |
| 18               | 1                | 0              | -0.762243               | -1.269958 | 0.633116  |
| 19               | 1                | 0              | 2.132605                | 4.152333  | -3.027963 |
| 20               | 1                | 0              | 4.353199                | 3.273761  | 2.344992  |
| 21               | 9                | 0              | 2.252604                | 1.851246  | 2.237266  |
| 22               | 9                | 0              | 5.446321                | 4.746696  | 0.499888  |
| 23               | 6                | 0              | 1.475112                | -0.275130 | 1.365230  |
| 24               | 6                | 0              | -2.543058               | -0.802953 | -1.338056 |
| 25               | 8                | 0              | 2.678305                | -0.599484 | 0.971568  |
| 26               | 7                | 0              | 1.111169                | -0.596098 | 2.566658  |
| 27               | 6                | 0              | 2.002023                | -1.368703 | 3.442989  |
| 28               | 1                | 0              | 2.595963                | -0.672709 | 4.038374  |
| 29               | 1                | 0              | 1.378755                | -1.974929 | 4.097686  |
| 30               | 1                | 0              | 2.651934                | -2.004413 | 2.850402  |
| 31               | 6                | 0              | -0.107737               | -0.087536 | 3.207468  |
| 32               | 1                | 0              | -0.798616               | -0.915305 | 3.371583  |
| 33               | 1                | 0              | 0.181537                | 0.339563  | 4.168180  |
| 34               | 1                | 0              | -0.580450               | 0.673589  | 2.593498  |
| 35               | 7                | 0              | -2.459681               | -2.016603 | -1.788306 |
| 36               | 6                | 0              | -1.190959               | -2.666141 | -2.148578 |
| 37               | 1                | 0              | -0.375941               | -1.947200 | -2.169547 |
| 38               | 1                | 0              | -0.975596               | -3.446591 | -1.418251 |
| 39               | 1                | 0              | -1.316732               | -3.113417 | -3.134527 |
| 40               | 6                | 0              | -3.668837               | -2.823803 | -2.009527 |
| 41               | 1                | 0              | -3.416146               | -3.860126 | -1.793926 |
| 42               | 1                | 0              | -4.465204               | -2.483336 | -1.354560 |
| 43               | 1                | 0              | -3.975186               | -2.728811 | -3.052141 |
| 44               | 8                | 0              | -3.728196               | -0.279349 | -1.203952 |
| 45               | 5                | 0              | 2.983595                | -1.557313 | -0.099210 |
| 46               | 35               | 0              | 4.920917                | -2.040196 | 0.142123  |
| 47               | 35               | 0              | 1.782462                | -3.205259 | 0.170489  |
| 48               | 35               | 0              | 2.663058                | -0.818205 | -1.965425 |
| 49               | 5                | 0              | -4.236121               | 0.327607  | 0.038201  |
| 50               | 35               | 0              | -6.235542               | 0.406262  | -0.171539 |

|    |    |   |           |           |          |
|----|----|---|-----------|-----------|----------|
| 51 | 35 | 0 | -3.727724 | -0.925878 | 1.584011 |
| 52 | 35 | 0 | -3.477523 | 2.173332  | 0.383892 |

---

### Equilibrium Geometry for NMR calculations of Amide-(BBr<sub>3</sub>)<sub>2</sub> at ωB97XD/6-311++G\*\*

# nmr=(giao,spinspin) wb97xd/6-311++g(d,p) scrf=(iefpcm,solvent=dichloromethane) geom=connectivity

---

| Center<br>Number | Atomic<br>Number | Atomic<br>Type | Coordinates (Angstroms) |           |           |
|------------------|------------------|----------------|-------------------------|-----------|-----------|
|                  |                  |                | X                       | Y         | Z         |
| 1                | 6                | 0              | -1.356242               | -0.039798 | -1.008982 |
| 2                | 6                | 0              | -1.009497               | 1.038801  | -1.787849 |
| 3                | 6                | 0              | 0.135281                | 1.797994  | -1.488840 |
| 4                | 6                | 0              | 0.905530                | 1.520097  | -0.332051 |
| 5                | 6                | 0              | 0.551952                | 0.355564  | 0.406295  |
| 6                | 6                | 0              | -0.551645               | -0.405650 | 0.073528  |
| 7                | 6                | 0              | 0.565275                | 2.791010  | -2.432460 |
| 8                | 6                | 0              | 2.039327                | 2.388881  | -0.051035 |
| 9                | 6                | 0              | 2.498176                | 3.277659  | -1.060382 |
| 10               | 6                | 0              | 1.733849                | 3.442574  | -2.264282 |
| 11               | 6                | 0              | 3.652134                | 4.060308  | -0.872664 |
| 12               | 1                | 0              | 4.004649                | 4.719547  | -1.655631 |
| 13               | 6                | 0              | 4.305668                | 4.001558  | 0.327324  |
| 14               | 6                | 0              | 3.841216                | 3.232090  | 1.391789  |
| 15               | 6                | 0              | 2.723147                | 2.471544  | 1.177476  |
| 16               | 1                | 0              | -0.046381               | 2.961736  | -3.310501 |
| 17               | 1                | 0              | -1.599431               | 1.300448  | -2.659797 |
| 18               | 1                | 0              | -0.774192               | -1.308742 | 0.631853  |
| 19               | 1                | 0              | 2.094542                | 4.142632  | -3.008427 |
| 20               | 1                | 0              | 4.320914                | 3.254001  | 2.360929  |
| 21               | 9                | 0              | 2.228639                | 1.820302  | 2.247404  |
| 22               | 9                | 0              | 5.406480                | 4.739625  | 0.520788  |
| 23               | 6                | 0              | 1.463091                | -0.307388 | 1.365908  |
| 24               | 6                | 0              | -2.567499               | -0.830863 | -1.329052 |
| 25               | 8                | 0              | 2.680819                | -0.591718 | 0.981671  |
| 26               | 7                | 0              | 1.095256                | -0.655368 | 2.558128  |
| 27               | 6                | 0              | 1.994203                | -1.420255 | 3.433224  |
| 28               | 1                | 0              | 2.564906                | -0.719497 | 4.045332  |
| 29               | 1                | 0              | 1.377835                | -2.049808 | 4.072055  |
| 30               | 1                | 0              | 2.664915                | -2.032310 | 2.839144  |
| 31               | 6                | 0              | -0.141576               | -0.185697 | 3.194078  |
| 32               | 1                | 0              | -0.813955               | -1.032249 | 3.337270  |
| 33               | 1                | 0              | 0.128395                | 0.231742  | 4.164485  |
| 34               | 1                | 0              | -0.624562               | 0.574706  | 2.587393  |
| 35               | 7                | 0              | -2.489389               | -2.043918 | -1.779999 |
| 36               | 6                | 0              | -1.223791               | -2.697187 | -2.143288 |
| 37               | 1                | 0              | -0.407268               | -1.980152 | -2.164872 |
| 38               | 1                | 0              | -1.010974               | -3.479507 | -1.414305 |
| 39               | 1                | 0              | -1.353328               | -3.142021 | -3.129703 |
| 40               | 6                | 0              | -3.701054               | -2.846689 | -2.004017 |
| 41               | 1                | 0              | -3.451446               | -3.884398 | -1.792108 |
| 42               | 1                | 0              | -4.496411               | -2.506421 | -1.347930 |
| 43               | 1                | 0              | -4.006262               | -2.746887 | -3.046407 |
| 44               | 8                | 0              | -3.751600               | -0.300859 | -1.197304 |
| 45               | 5                | 0              | 3.032985                | -1.516782 | -0.102010 |

|    |    |   |           |           |           |
|----|----|---|-----------|-----------|-----------|
| 46 | 35 | 0 | 4.983397  | -1.941513 | 0.163932  |
| 47 | 35 | 0 | 1.885759  | -3.209597 | 0.107601  |
| 48 | 35 | 0 | 2.725998  | -0.749087 | -1.959615 |
| 49 | 5  | 0 | -4.262261 | 0.314627  | 0.037966  |
| 50 | 35 | 0 | -6.262824 | 0.398028  | -0.182409 |
| 51 | 35 | 0 | -3.768395 | -0.923926 | 1.599136  |
| 52 | 35 | 0 | -3.505698 | 2.164294  | 0.374428  |

---

### Equilibrium Geometry for NBO charge calculations of Amide-(BBr<sub>3</sub>)<sub>2</sub> at M06-2X/6-311++G\*\*

# opt freq 6-311++g(d,p) scrf=(iefpcm,solvent=chloroform) pop=nbo geom=connectivity m062x

| Center Number | Atomic Number | Atomic Type | Coordinates (Angstroms) |           |           |
|---------------|---------------|-------------|-------------------------|-----------|-----------|
|               |               |             | X                       | Y         | Z         |
| 1             | 6             | 0           | -1.335252               | -0.008535 | -1.015747 |
| 2             | 6             | 0           | -0.985274               | 1.066943  | -1.797309 |
| 3             | 6             | 0           | 0.161249                | 1.823857  | -1.499841 |
| 4             | 6             | 0           | 0.929550                | 1.547465  | -0.341556 |
| 5             | 6             | 0           | 0.568607                | 0.389517  | 0.403208  |
| 6             | 6             | 0           | -0.536253               | -0.369658 | 0.071824  |
| 7             | 6             | 0           | 0.596359                | 2.811092  | -2.446914 |
| 8             | 6             | 0           | 2.067388                | 2.411577  | -0.063640 |
| 9             | 6             | 0           | 2.531314                | 3.293544  | -1.076367 |
| 10            | 6             | 0           | 1.768020                | 3.457382  | -2.280935 |
| 11            | 6             | 0           | 3.689130                | 4.070862  | -0.891334 |
| 12            | 1             | 0           | 4.045929                | 4.724758  | -1.676770 |
| 13            | 6             | 0           | 4.342183                | 4.013675  | 0.308944  |
| 14            | 6             | 0           | 3.873097                | 3.250948  | 1.376151  |
| 15            | 6             | 0           | 2.751165                | 2.495490  | 1.164636  |
| 16            | 1             | 0           | -0.014164               | 2.981403  | -3.325815 |
| 17            | 1             | 0           | -1.573231               | 1.326700  | -2.671187 |
| 18            | 1             | 0           | -0.762243               | -1.269958 | 0.633116  |
| 19            | 1             | 0           | 2.132605                | 4.152333  | -3.027963 |
| 20            | 1             | 0           | 4.353199                | 3.273761  | 2.344992  |
| 21            | 9             | 0           | 2.252604                | 1.851246  | 2.237266  |
| 22            | 9             | 0           | 5.446321                | 4.746696  | 0.499888  |
| 23            | 6             | 0           | 1.475112                | -0.275130 | 1.365230  |
| 24            | 6             | 0           | -2.543058               | -0.802953 | -1.338056 |
| 25            | 8             | 0           | 2.678305                | -0.599484 | 0.971568  |
| 26            | 7             | 0           | 1.111169                | -0.596098 | 2.566658  |
| 27            | 6             | 0           | 2.002023                | -1.368703 | 3.442989  |
| 28            | 1             | 0           | 2.595963                | -0.672709 | 4.038374  |
| 29            | 1             | 0           | 1.378755                | -1.974929 | 4.097686  |
| 30            | 1             | 0           | 2.651934                | -2.004413 | 2.850402  |
| 31            | 6             | 0           | -0.107737               | -0.087536 | 3.207468  |
| 32            | 1             | 0           | -0.798616               | -0.915305 | 3.371583  |
| 33            | 1             | 0           | 0.181537                | 0.339563  | 4.168180  |
| 34            | 1             | 0           | -0.580450               | 0.673589  | 2.593498  |
| 35            | 7             | 0           | -2.459681               | -2.016603 | -1.788306 |
| 36            | 6             | 0           | -1.190959               | -2.666141 | -2.148578 |
| 37            | 1             | 0           | -0.375941               | -1.947200 | -2.169547 |
| 38            | 1             | 0           | -0.975596               | -3.446591 | -1.418251 |

|    |    |   |           |           |           |
|----|----|---|-----------|-----------|-----------|
| 39 | 1  | 0 | -1.316732 | -3.113417 | -3.134527 |
| 40 | 6  | 0 | -3.668837 | -2.823803 | -2.009527 |
| 41 | 1  | 0 | -3.416146 | -3.860126 | -1.793926 |
| 42 | 1  | 0 | -4.465204 | -2.483336 | -1.354560 |
| 43 | 1  | 0 | -3.975186 | -2.728811 | -3.052141 |
| 44 | 8  | 0 | -3.728196 | -0.279349 | -1.203952 |
| 45 | 5  | 0 | 2.983595  | -1.557313 | -0.099210 |
| 46 | 35 | 0 | 4.920917  | -2.040196 | 0.142123  |
| 47 | 35 | 0 | 1.782462  | -3.205259 | 0.170489  |
| 48 | 35 | 0 | 2.663058  | -0.818205 | -1.965425 |
| 49 | 5  | 0 | -4.236121 | 0.327607  | 0.038201  |
| 50 | 35 | 0 | -6.235542 | 0.406262  | -0.171539 |
| 51 | 35 | 0 | -3.727724 | -0.925878 | 1.584011  |
| 52 | 35 | 0 | -3.477523 | 2.173332  | 0.383892  |

---

### Equilibrium Geometry for the Protonation of Probe Amide in 3 at M06-2X/6-311++G\*\*

# opt 6-311++g(d,p) geom=connectivity m062x

---

| Center<br>Number | Atomic<br>Number | Atomic<br>Type | Coordinates (Angstroms) |           |           |
|------------------|------------------|----------------|-------------------------|-----------|-----------|
|                  |                  |                | X                       | Y         | Z         |
| 1                | 6                | 0              | -2.332613               | -0.978380 | 0.150361  |
| 2                | 1                | 0              | -1.932985               | -3.068699 | 0.124202  |
| 3                | 6                | 0              | -1.500840               | -2.073934 | 0.112448  |
| 4                | 6                | 0              | -0.382743               | 0.457910  | 0.261174  |
| 5                | 6                | 0              | -0.100840               | -1.936382 | 0.083038  |
| 6                | 6                | 0              | -1.758431               | 0.292372  | 0.273937  |
| 7                | 6                | 0              | 0.497168                | -0.651018 | 0.077578  |
| 8                | 6                | 0              | 0.716750                | -3.116730 | 0.126657  |
| 9                | 1                | 0              | -2.399315               | 1.149888  | 0.453089  |
| 10               | 6                | 0              | 2.062058                | -3.029482 | 0.176864  |
| 11               | 1                | 0              | 0.220015                | -4.079171 | 0.157763  |
| 12               | 1                | 0              | 2.675291                | -3.918856 | 0.259843  |
| 13               | 6                | 0              | 2.719604                | -1.760381 | 0.044074  |
| 14               | 6                | 0              | 4.123566                | -1.720533 | -0.040973 |
| 15               | 6                | 0              | 1.943102                | -0.575759 | -0.081945 |
| 16               | 6                | 0              | 4.740672                | -0.529975 | -0.312207 |
| 17               | 1                | 0              | 4.707886                | -2.624483 | 0.073651  |
| 18               | 6                | 0              | 4.025431                | 0.642486  | -0.552329 |
| 19               | 1                | 0              | 4.520448                | 1.559300  | -0.842935 |
| 20               | 6                | 0              | 2.662604                | 0.580251  | -0.447099 |
| 21               | 6                | 0              | 0.084450                | 1.772870  | 0.743171  |
| 22               | 8                | 0              | 0.890381                | 1.815841  | 1.780314  |
| 23               | 7                | 0              | -0.310663               | 2.912726  | 0.270297  |
| 24               | 9                | 0              | 1.981520                | 1.696410  | -0.775812 |
| 25               | 6                | 0              | 0.071856                | 4.170827  | 0.927943  |
| 26               | 1                | 0              | -0.707429               | 4.901593  | 0.721931  |
| 27               | 1                | 0              | 1.021063                | 4.516649  | 0.515115  |
| 28               | 1                | 0              | 0.166618                | 4.016525  | 1.998390  |
| 29               | 6                | 0              | -0.980922               | 3.058321  | -1.027108 |
| 30               | 1                | 0              | -2.002154               | 3.407477  | -0.872952 |
| 31               | 1                | 0              | -0.977896               | 2.116117  | -1.566111 |
| 32               | 1                | 0              | -0.426486               | 3.804280  | -1.597117 |

|    |   |   |           |           |           |
|----|---|---|-----------|-----------|-----------|
| 33 | 6 | 0 | -3.819942 | -1.198061 | 0.261258  |
| 34 | 8 | 0 | -4.232638 | -2.088203 | 0.991408  |
| 35 | 7 | 0 | -4.635402 | -0.358531 | -0.418304 |
| 36 | 6 | 0 | -4.240705 | 0.445824  | -1.568539 |
| 37 | 1 | 0 | -3.208043 | 0.251111  | -1.847684 |
| 38 | 1 | 0 | -4.369953 | 1.511099  | -1.358768 |
| 39 | 1 | 0 | -4.873533 | 0.180990  | -2.419053 |
| 40 | 6 | 0 | -6.073236 | -0.483537 | -0.212558 |
| 41 | 1 | 0 | -6.267197 | -0.823857 | 0.801256  |
| 42 | 1 | 0 | -6.507103 | -1.198861 | -0.917496 |
| 43 | 1 | 0 | -6.533103 | 0.492987  | -0.368409 |
| 44 | 9 | 0 | 6.073039  | -0.477589 | -0.400890 |
| 45 | 1 | 0 | 1.021435  | 0.935926  | 2.163401  |

---

### Equilibrium Geometry for the Protonation of Control Amide in 3 at M06-2X/6-311++G\*\*

# opt 6-311++g(d,p) geom=connectivity m062x

---

| Center<br>Number | Atomic<br>Number | Atomic<br>Type | Coordinates (Angstroms) |           |           |
|------------------|------------------|----------------|-------------------------|-----------|-----------|
|                  |                  |                | X                       | Y         | Z         |
| 1                | 6                | 0              | -2.312413               | -0.925421 | 0.160813  |
| 2                | 1                | 0              | -1.953342               | -3.042368 | -0.000106 |
| 3                | 6                | 0              | -1.517595               | -2.050676 | 0.072955  |
| 4                | 6                | 0              | -0.346360               | 0.477185  | 0.311904  |
| 5                | 6                | 0              | -0.118040               | -1.930262 | 0.046077  |
| 6                | 6                | 0              | -1.716796               | 0.337825  | 0.323642  |
| 7                | 6                | 0              | 0.491958                | -0.649243 | 0.073484  |
| 8                | 6                | 0              | 0.685009                | -3.121940 | 0.057582  |
| 9                | 1                | 0              | -2.335095               | 1.206060  | 0.526947  |
| 10               | 6                | 0              | 2.030073                | -3.046391 | 0.122535  |
| 11               | 1                | 0              | 0.180565                | -4.080994 | 0.058947  |
| 12               | 1                | 0              | 2.634601                | -3.943231 | 0.190370  |
| 13               | 6                | 0              | 2.700578                | -1.779154 | 0.027725  |
| 14               | 6                | 0              | 4.105657                | -1.748227 | -0.031858 |
| 15               | 6                | 0              | 1.934948                | -0.588653 | -0.086701 |
| 16               | 6                | 0              | 4.730957                | -0.554228 | -0.267759 |
| 17               | 1                | 0              | 4.684305                | -2.656481 | 0.076320  |
| 18               | 6                | 0              | 4.025981                | 0.624266  | -0.506118 |
| 19               | 1                | 0              | 4.532233                | 1.541367  | -0.775329 |
| 20               | 6                | 0              | 2.659839                | 0.570460  | -0.430173 |
| 21               | 6                | 0              | 0.183835                | 1.782346  | 0.866663  |
| 22               | 8                | 0              | 0.891236                | 1.740740  | 1.861316  |
| 23               | 7                | 0              | -0.266235               | 2.931373  | 0.313361  |
| 24               | 9                | 0              | 1.993867                | 1.680353  | -0.788486 |
| 25               | 6                | 0              | 0.159740                | 4.182546  | 0.926409  |
| 26               | 1                | 0              | -0.545562               | 4.964870  | 0.645537  |
| 27               | 1                | 0              | 1.161098                | 4.461703  | 0.582542  |
| 28               | 1                | 0              | 0.175466                | 4.074317  | 2.007956  |
| 29               | 6                | 0              | -0.709834               | 3.037217  | -1.070532 |
| 30               | 1                | 0              | -1.684205               | 3.529618  | -1.120341 |
| 31               | 1                | 0              | -0.775809               | 2.054878  | -1.531535 |
| 32               | 1                | 0              | 0.012891                | 3.630267  | -1.638587 |
| 33               | 6                | 0              | -3.775341               | -1.067027 | 0.199014  |

|    |   |   |           |           |           |
|----|---|---|-----------|-----------|-----------|
| 34 | 8 | 0 | -4.317820 | -2.011583 | 0.933367  |
| 35 | 7 | 0 | -4.595990 | -0.305088 | -0.457710 |
| 36 | 6 | 0 | -4.171593 | 0.639543  | -1.500818 |
| 37 | 1 | 0 | -3.162468 | 0.414557  | -1.832394 |
| 38 | 1 | 0 | -4.230851 | 1.658221  | -1.116854 |
| 39 | 1 | 0 | -4.861055 | 0.527448  | -2.336625 |
| 40 | 6 | 0 | -6.050722 | -0.418912 | -0.268229 |
| 41 | 1 | 0 | -6.268782 | -0.774170 | 0.734041  |
| 42 | 1 | 0 | -6.455800 | -1.112267 | -1.006143 |
| 43 | 1 | 0 | -6.478854 | 0.570057  | -0.418284 |
| 44 | 9 | 0 | 6.066650  | -0.506960 | -0.329968 |
| 45 | 1 | 0 | -3.665015 | -2.429155 | 1.512923  |

---

## Energy Calculations for Structures in Figure 9

### Equilibrium Geometry of TS1 at M06-2X/6-311++G\*\* (Amide Isomerization)

# opt=(calcf,ts,noeigentest) 6-311++g(d,p) scrf=(iefpcm,solvent=chloroform) geom=connectivity m062x

| Center<br>Number | Atomic<br>Number | Atomic<br>Type | Coordinates (Angstroms) |           |           |
|------------------|------------------|----------------|-------------------------|-----------|-----------|
|                  |                  |                | X                       | Y         | Z         |
| 1                | 6                | 0              | 2.246242                | -1.082434 | -0.190991 |
| 2                | 1                | 0              | 1.769064                | -3.158156 | -0.395771 |
| 3                | 6                | 0              | 1.387323                | -2.147568 | -0.305136 |
| 4                | 6                | 0              | 0.358808                | 0.445603  | -0.233411 |
| 5                | 6                | 0              | -0.010850               | -1.953378 | -0.302833 |
| 6                | 6                | 0              | 1.723952                | 0.218781  | -0.190445 |
| 7                | 6                | 0              | -0.547446               | -0.652423 | -0.154988 |
| 8                | 6                | 0              | -0.886123               | -3.073360 | -0.515812 |
| 9                | 1                | 0              | 2.385449                | 1.075344  | -0.196800 |
| 10               | 6                | 0              | -2.225359               | -2.909056 | -0.565502 |
| 11               | 1                | 0              | -0.438215               | -4.047699 | -0.679604 |
| 12               | 1                | 0              | -2.882387               | -3.743667 | -0.784670 |
| 13               | 6                | 0              | -2.820027               | -1.643957 | -0.232959 |
| 14               | 6                | 0              | -4.220079               | -1.537039 | -0.104652 |
| 15               | 6                | 0              | -1.981762               | -0.539894 | 0.061271  |
| 16               | 6                | 0              | -4.791941               | -0.388648 | 0.387334  |
| 17               | 1                | 0              | -4.833614               | -2.389474 | -0.371229 |
| 18               | 6                | 0              | -3.975151               | 0.666772  | 0.816834  |
| 19               | 1                | 0              | -4.381332               | 1.552444  | 1.289070  |
| 20               | 6                | 0              | -2.616305               | 0.562777  | 0.667659  |
| 21               | 6                | 0              | -0.081667               | 1.813840  | -0.656709 |
| 22               | 8                | 0              | -1.103938               | 2.003476  | -1.262780 |
| 23               | 7                | 0              | 0.854289                | 2.880914  | -0.390211 |
| 24               | 9                | 0              | -1.864724               | 1.538262  | 1.210610  |
| 25               | 6                | 0              | 1.473596                | 3.315953  | -1.645629 |
| 26               | 1                | 0              | 2.237096                | 4.060989  | -1.416265 |
| 27               | 1                | 0              | 0.739480                | 3.752708  | -2.335546 |
| 28               | 1                | 0              | 1.951159                | 2.467289  | -2.138580 |
| 29               | 6                | 0              | 0.167459                | 3.997773  | 0.264247  |
| 30               | 1                | 0              | 0.911687                | 4.759340  | 0.502114  |
| 31               | 1                | 0              | -0.284677               | 3.650818  | 1.193165  |
| 32               | 1                | 0              | -0.612515               | 4.437593  | -0.369860 |
| 33               | 6                | 0              | 3.760998                | -1.300428 | -0.145163 |
| 34               | 8                | 0              | 4.285403                | -2.129220 | -0.887746 |
| 35               | 7                | 0              | 4.577879                | -0.529114 | 0.771937  |
| 36               | 6                | 0              | 6.032974                | -0.738141 | 0.814586  |
| 37               | 1                | 0              | 6.248044                | -1.812643 | 0.800923  |
| 38               | 1                | 0              | 6.438458                | -0.296463 | 1.732398  |
| 39               | 1                | 0              | 6.496469                | -0.261243 | -0.056265 |
| 40               | 6                | 0              | 3.949754                | 0.462932  | 1.658963  |
| 41               | 1                | 0              | 4.332161                | 0.334587  | 2.677737  |
| 42               | 1                | 0              | 2.863437                | 0.320774  | 1.654952  |
| 43               | 1                | 0              | 4.187376                | 1.472111  | 1.304202  |
| 44               | 9                | 0              | -6.165321               | -0.287142 | 0.518521  |

## Equilibrium Geometry for Frequency Calculations of TS1 at M06-2X/6-311++G\*\* (Amide Isomerization)

# freq 6-311++g(d,p) scrf=(iefpcm,solvent=chloroform) geom=connectivity m062x

Number of imaginary frequencies = 1

| Center<br>Number | Atomic<br>Number | Atomic<br>Type | Coordinates (Angstroms) |           |           |
|------------------|------------------|----------------|-------------------------|-----------|-----------|
|                  |                  |                | X                       | Y         | Z         |
| 1                | 6                | 0              | 2.265760                | -1.030695 | -0.124766 |
| 2                | 1                | 0              | 1.836820                | -3.102191 | -0.378880 |
| 3                | 6                | 0              | 1.420846                | -2.106472 | -0.269192 |
| 4                | 6                | 0              | 0.355035                | 0.469670  | -0.206715 |
| 5                | 6                | 0              | 0.022350                | -1.934642 | -0.276538 |
| 6                | 6                | 0              | 1.720746                | 0.263871  | -0.140561 |
| 7                | 6                | 0              | -0.536004               | -0.642496 | -0.134623 |
| 8                | 6                | 0              | -0.833857               | -3.068763 | -0.492878 |
| 9                | 1                | 0              | 2.373558                | 1.128138  | -0.160422 |
| 10               | 6                | 0              | -2.175947               | -2.927271 | -0.550454 |
| 11               | 1                | 0              | -0.370743               | -4.036596 | -0.649061 |
| 12               | 1                | 0              | -2.817163               | -3.772899 | -0.770092 |
| 13               | 6                | 0              | -2.791809               | -1.669364 | -0.230656 |
| 14               | 6                | 0              | -4.194796               | -1.588748 | -0.119898 |
| 15               | 6                | 0              | -1.971988               | -0.548901 | 0.060158  |
| 16               | 6                | 0              | -4.753576               | -0.433395 | 0.350567  |
| 17               | 1                | 0              | -4.819085               | -2.437152 | -0.370174 |
| 18               | 6                | 0              | -3.986525               | 0.650458  | 0.778977  |
| 19               | 1                | 0              | -4.440798               | 1.520368  | 1.233588  |
| 20               | 6                | 0              | -2.627292               | 0.554869  | 0.642670  |
| 21               | 6                | 0              | -0.090822               | 1.827300  | -0.655504 |
| 22               | 8                | 0              | -1.086619               | 1.986029  | -1.315240 |
| 23               | 7                | 0              | 0.802052                | 2.914281  | -0.343028 |
| 24               | 9                | 0              | -1.896026               | 1.548174  | 1.177480  |
| 25               | 6                | 0              | 1.413560                | 3.421278  | -1.579309 |
| 26               | 1                | 0              | 2.137537                | 4.193079  | -1.314286 |
| 27               | 1                | 0              | 0.667069                | 3.847823  | -2.261748 |
| 28               | 1                | 0              | 1.938488                | 2.613120  | -2.092819 |
| 29               | 6                | 0              | 0.065163                | 3.984005  | 0.340740  |
| 30               | 1                | 0              | 0.775338                | 4.766893  | 0.610328  |
| 31               | 1                | 0              | -0.386837               | 3.593611  | 1.252718  |
| 32               | 1                | 0              | -0.720182               | 4.414388  | -0.293420 |
| 33               | 6                | 0              | 3.750334                | -1.271068 | -0.141030 |
| 34               | 8                | 0              | 4.219679                | -2.112878 | -0.898441 |
| 35               | 7                | 0              | 4.525189                | -0.501389 | 0.662980  |
| 36               | 6                | 0              | 5.971221                | -0.630473 | 0.552473  |
| 37               | 1                | 0              | 6.348611                | -1.411592 | 1.220126  |
| 38               | 1                | 0              | 6.426991                | 0.321309  | 0.828806  |
| 39               | 1                | 0              | 6.238664                | -0.881764 | -0.470719 |
| 40               | 6                | 0              | 4.056400                | 0.224710  | 1.837385  |
| 41               | 1                | 0              | 4.640133                | -0.095552 | 2.704292  |
| 42               | 1                | 0              | 3.009532                | 0.013515  | 2.037483  |
| 43               | 1                | 0              | 4.188660                | 1.302316  | 1.708100  |
| 44               | 9                | 0              | -6.087814               | -0.338785 | 0.465952  |



### Equilibrium Geometry of 3a at M06-2X/6-311++G\*\*

# opt 6-311++g(d,p) scrf=(iefpcm,solvent=chloroform) geom=connectivity m062x

---

| Center<br>Number | Atomic<br>Number | Atomic<br>Type | Coordinates (Angstroms) |           |           |
|------------------|------------------|----------------|-------------------------|-----------|-----------|
|                  |                  |                | X                       | Y         | Z         |
| 1                | 6                | 0              | 4.757613                | -0.435835 | 0.421045  |
| 2                | 1                | 0              | 4.869675                | -2.091645 | -0.921698 |
| 3                | 6                | 0              | 4.221829                | -1.380038 | -0.421782 |
| 4                | 6                | 0              | 2.599980                | 0.343229  | 1.032287  |
| 5                | 6                | 0              | 2.823521                | -1.445253 | -0.563709 |
| 6                | 6                | 0              | 3.963486                | 0.408240  | 1.201505  |
| 7                | 6                | 0              | 1.991535                | -0.479444 | 0.059381  |
| 8                | 6                | 0              | 2.206273                | -2.567889 | -1.223161 |
| 9                | 1                | 0              | 4.399029                | 1.054397  | 1.951718  |
| 10               | 6                | 0              | 0.870644                | -2.763946 | -1.137955 |
| 11               | 1                | 0              | 2.849266                | -3.303908 | -1.697203 |
| 12               | 1                | 0              | 0.413322                | -3.668430 | -1.529902 |
| 13               | 6                | 0              | 0.002699                | -1.752864 | -0.588230 |
| 14               | 6                | 0              | -1.387829               | -1.947805 | -0.536382 |
| 15               | 6                | 0              | 0.558532                | -0.519184 | -0.160092 |
| 16               | 6                | 0              | -2.224557               | -0.940495 | -0.096673 |
| 17               | 1                | 0              | -1.820611               | -2.895901 | -0.843791 |
| 18               | 6                | 0              | -1.688695               | 0.346874  | 0.073791  |
| 19               | 1                | 0              | -2.362283               | 1.187289  | 0.220488  |
| 20               | 6                | 0              | -0.328114               | 0.591109  | -0.036837 |
| 21               | 9                | 0              | 1.833749                | 0.981258  | 1.912587  |
| 22               | 6                | 0              | 0.140414                | 2.006992  | -0.277178 |
| 23               | 8                | 0              | 1.255540                | 2.417032  | -0.009964 |
| 24               | 7                | 0              | -0.800327               | 2.861982  | -0.839534 |
| 25               | 6                | 0              | -1.664838               | 2.484181  | -1.953980 |
| 26               | 1                | 0              | -1.300158               | 2.957720  | -2.875238 |
| 27               | 1                | 0              | -2.692658               | 2.819966  | -1.779109 |
| 28               | 1                | 0              | -1.671679               | 1.407075  | -2.108983 |
| 29               | 6                | 0              | -0.390617               | 4.257859  | -0.895015 |
| 30               | 1                | 0              | 0.073274                | 4.542365  | 0.047891  |
| 31               | 1                | 0              | -1.278557               | 4.870834  | -1.069614 |
| 32               | 1                | 0              | 0.333507                | 4.434536  | -1.702140 |
| 33               | 6                | 0              | -3.700702               | -1.215770 | -0.053620 |
| 34               | 8                | 0              | -4.202933               | -1.979662 | -0.864695 |
| 35               | 7                | 0              | -4.450565               | -0.537613 | 0.873870  |
| 36               | 6                | 0              | -3.944957               | -0.044945 | 2.144668  |
| 37               | 1                | 0              | -4.404034               | -0.607542 | 2.966132  |
| 38               | 1                | 0              | -4.191801               | 1.014023  | 2.275177  |
| 39               | 1                | 0              | -2.865376               | -0.168205 | 2.210201  |
| 40               | 6                | 0              | -5.890539               | -0.713377 | 0.819715  |
| 41               | 1                | 0              | -6.214810               | -1.538368 | 1.465585  |
| 42               | 1                | 0              | -6.184578               | -0.933354 | -0.203791 |
| 43               | 1                | 0              | -6.373981               | 0.208650  | 1.157912  |
| 44               | 9                | 0              | 6.084448                | -0.364467 | 0.570369  |

---

### Equilibrium Geometry of TS2 at M06-2X/6-311++G\*\*

# opt=(calcfc,ts,noeigentest) 6-311++g(d,p) scrf=(iefpcm,solvent=chloroform) geom=connectivity m062x

---

| Center<br>Number | Atomic<br>Number | Atomic<br>Type | Coordinates (Angstroms) |           |           |
|------------------|------------------|----------------|-------------------------|-----------|-----------|
|                  |                  |                | X                       | Y         | Z         |
| 1                | 6                | 0              | 2.263033                | -0.868221 | -0.098740 |
| 2                | 1                | 0              | 1.879698                | -2.806455 | -0.909022 |
| 3                | 6                | 0              | 1.442050                | -1.878309 | -0.557495 |
| 4                | 6                | 0              | 0.338509                | 0.609521  | 0.062678  |
| 5                | 6                | 0              | 0.047853                | -1.707806 | -0.588300 |
| 6                | 6                | 0              | 1.705013                | 0.399360  | 0.126346  |
| 7                | 6                | 0              | -0.525007               | -0.508208 | -0.098633 |
| 8                | 6                | 0              | -0.804433               | -2.692915 | -1.205841 |
| 9                | 1                | 0              | 2.363115                | 1.251246  | 0.266333  |
| 10               | 6                | 0              | -2.136322               | -2.491851 | -1.317235 |
| 11               | 1                | 0              | -0.338441               | -3.571906 | -1.636882 |
| 12               | 1                | 0              | -2.763202               | -3.195338 | -1.852801 |
| 13               | 6                | 0              | -2.772494               | -1.409718 | -0.609277 |
| 14               | 6                | 0              | -4.174809               | -1.351189 | -0.505753 |
| 15               | 6                | 0              | -1.961555               | -0.494722 | 0.105329  |
| 16               | 6                | 0              | -4.728056               | -0.471160 | 0.387197  |
| 17               | 1                | 0              | -4.805585               | -2.020400 | -1.076974 |
| 18               | 6                | 0              | -3.962687               | 0.300482  | 1.260038  |
| 19               | 1                | 0              | -4.421057               | 0.875323  | 2.053351  |
| 20               | 6                | 0              | -2.596852               | 0.242294  | 1.123870  |
| 21               | 6                | 0              | -0.153455               | 2.028573  | -0.133226 |
| 22               | 8                | 0              | -1.128792               | 2.508084  | 0.419908  |
| 23               | 7                | 0              | 0.597666                | 2.773141  | -1.003382 |
| 24               | 9                | 0              | -1.855613               | 0.779706  | 2.095696  |
| 25               | 6                | 0              | 1.366060                | 2.247126  | -2.130672 |
| 26               | 1                | 0              | 2.427449                | 2.489060  | -2.029497 |
| 27               | 1                | 0              | 0.990650                | 2.705129  | -3.049726 |
| 28               | 1                | 0              | 1.255018                | 1.169856  | -2.220709 |
| 29               | 6                | 0              | 0.253216                | 4.183624  | -1.124322 |
| 30               | 1                | 0              | 1.123271                | 4.717921  | -1.507791 |
| 31               | 1                | 0              | -0.020038               | 4.582237  | -0.150454 |
| 32               | 1                | 0              | -0.586411               | 4.329686  | -1.812083 |
| 33               | 6                | 0              | 3.749542                | -1.093256 | -0.092230 |
| 34               | 8                | 0              | 4.270176                | -1.738290 | -0.995881 |
| 35               | 7                | 0              | 4.472280                | -0.521482 | 0.902785  |
| 36               | 6                | 0              | 3.937067                | -0.084437 | 2.186871  |
| 37               | 1                | 0              | 2.878119                | -0.311768 | 2.268566  |
| 38               | 1                | 0              | 4.087052                | 0.989842  | 2.323761  |
| 39               | 1                | 0              | 4.462973                | -0.613186 | 2.986235  |
| 40               | 6                | 0              | 5.923421                | -0.622704 | 0.842406  |
| 41               | 1                | 0              | 6.274347                | -1.535209 | 1.334916  |
| 42               | 1                | 0              | 6.353742                | 0.241326  | 1.350466  |
| 43               | 1                | 0              | 6.246118                | -0.636453 | -0.195520 |
| 44               | 9                | 0              | -6.065284               | -0.401904 | 0.501164  |

---

## Equilibrium Geometry for Frequency Calculations of TS2 at M06-2X/6-311++G\*\*

# freq 6-311++g(d,p) scrf=(iefpcm,solvent=chloroform) geom=connectivity m062x

Number of imaginary frequencies = 1

| Center<br>Number | Atomic<br>Number | Atomic<br>Type | Coordinates (Angstroms) |           |           |
|------------------|------------------|----------------|-------------------------|-----------|-----------|
|                  |                  |                | X                       | Y         | Z         |
| 1                | 6                | 0              | 2.263033                | -0.868221 | -0.098740 |
| 2                | 1                | 0              | 1.879698                | -2.806455 | -0.909022 |
| 3                | 6                | 0              | 1.442050                | -1.878309 | -0.557495 |
| 4                | 6                | 0              | 0.338509                | 0.609521  | 0.062678  |
| 5                | 6                | 0              | 0.047853                | -1.707806 | -0.588300 |
| 6                | 6                | 0              | 1.705013                | 0.399360  | 0.126346  |
| 7                | 6                | 0              | -0.525007               | -0.508208 | -0.098633 |
| 8                | 6                | 0              | -0.804433               | -2.692915 | -1.205841 |
| 9                | 1                | 0              | 2.363115                | 1.251246  | 0.266333  |
| 10               | 6                | 0              | -2.136322               | -2.491851 | -1.317235 |
| 11               | 1                | 0              | -0.338441               | -3.571906 | -1.636882 |
| 12               | 1                | 0              | -2.763202               | -3.195338 | -1.852801 |
| 13               | 6                | 0              | -2.772494               | -1.409718 | -0.609277 |
| 14               | 6                | 0              | -4.174809               | -1.351189 | -0.505753 |
| 15               | 6                | 0              | -1.961555               | -0.494722 | 0.105329  |
| 16               | 6                | 0              | -4.728056               | -0.471160 | 0.387197  |
| 17               | 1                | 0              | -4.805585               | -2.020400 | -1.076974 |
| 18               | 6                | 0              | -3.962687               | 0.300482  | 1.260038  |
| 19               | 1                | 0              | -4.421057               | 0.875323  | 2.053351  |
| 20               | 6                | 0              | -2.596852               | 0.242294  | 1.123870  |
| 21               | 6                | 0              | -0.153455               | 2.028573  | -0.133226 |
| 22               | 8                | 0              | -1.128792               | 2.508084  | 0.419908  |
| 23               | 7                | 0              | 0.597666                | 2.773141  | -1.003382 |
| 24               | 9                | 0              | -1.855613               | 0.779706  | 2.095696  |
| 25               | 6                | 0              | 1.366060                | 2.247126  | -2.130672 |
| 26               | 1                | 0              | 2.427449                | 2.489060  | -2.029497 |
| 27               | 1                | 0              | 0.990650                | 2.705129  | -3.049726 |
| 28               | 1                | 0              | 1.255018                | 1.169856  | -2.220709 |
| 29               | 6                | 0              | 0.253216                | 4.183624  | -1.124322 |
| 30               | 1                | 0              | 1.123271                | 4.717921  | -1.507791 |
| 31               | 1                | 0              | -0.020038               | 4.582237  | -0.150454 |
| 32               | 1                | 0              | -0.586411               | 4.329686  | -1.812083 |
| 33               | 6                | 0              | 3.749542                | -1.093256 | -0.092230 |
| 34               | 8                | 0              | 4.270176                | -1.738290 | -0.995881 |
| 35               | 7                | 0              | 4.472280                | -0.521482 | 0.902785  |
| 36               | 6                | 0              | 3.937067                | -0.084437 | 2.186871  |
| 37               | 1                | 0              | 2.878119                | -0.311768 | 2.268566  |
| 38               | 1                | 0              | 4.087052                | 0.989842  | 2.323761  |
| 39               | 1                | 0              | 4.462973                | -0.613186 | 2.986235  |
| 40               | 6                | 0              | 5.923421                | -0.622704 | 0.842406  |
| 41               | 1                | 0              | 6.274347                | -1.535209 | 1.334916  |
| 42               | 1                | 0              | 6.353742                | 0.241326  | 1.350466  |
| 43               | 1                | 0              | 6.246118                | -0.636453 | -0.195520 |
| 44               | 9                | 0              | -6.065284               | -0.401904 | 0.501164  |

## Equilibrium Geometry of 3b at M06-2X/6-311++G\*\*

# opt=noeigentest 6-311++g(d,p) scrf=(iefpcm,solvent=chloroform) geom=connectivity m062x

---

| Center<br>Number | Atomic<br>Number | Atomic<br>Type | Coordinates (Angstroms) |           |           |
|------------------|------------------|----------------|-------------------------|-----------|-----------|
|                  |                  |                | X                       | Y         | Z         |
| 1                | 6                | 0              | -2.573339               | -0.151014 | -0.378413 |
| 2                | 6                | 0              | -1.994995               | -1.390900 | -0.206655 |
| 3                | 6                | 0              | -0.596383               | -1.535618 | -0.125204 |
| 4                | 6                | 0              | 0.260563                | -0.401132 | -0.243237 |
| 5                | 6                | 0              | -0.364438               | 0.880239  | -0.280547 |
| 6                | 6                | 0              | -1.742029               | 0.978474  | -0.403046 |
| 7                | 6                | 0              | -0.048534               | -2.830874 | 0.159963  |
| 8                | 6                | 0              | 1.699228                | -0.650282 | -0.264908 |
| 9                | 6                | 0              | 2.199549                | -1.933611 | 0.115539  |
| 10               | 6                | 0              | 1.279529                | -3.008952 | 0.345085  |
| 11               | 6                | 0              | 3.584830                | -2.184669 | 0.192194  |
| 12               | 1                | 0              | 3.950993                | -3.154903 | 0.503125  |
| 13               | 6                | 0              | 4.463507                | -1.198314 | -0.170345 |
| 14               | 6                | 0              | 4.033253                | 0.030780  | -0.663223 |
| 15               | 6                | 0              | 2.677857                | 0.261175  | -0.716827 |
| 16               | 1                | 0              | -0.735561               | -3.663046 | 0.267853  |
| 17               | 1                | 0              | -2.611800               | -2.280546 | -0.132302 |
| 18               | 1                | 0              | -2.183219               | 1.963111  | -0.500840 |
| 19               | 1                | 0              | 1.678147                | -3.979527 | 0.617154  |
| 20               | 1                | 0              | 4.731064                | 0.771246  | -1.030278 |
| 21               | 9                | 0              | 2.295904                | 1.410439  | -1.300893 |
| 22               | 9                | 0              | 5.791377                | -1.425906 | -0.098260 |
| 23               | 6                | 0              | 0.315845                | 2.224460  | -0.123522 |
| 24               | 6                | 0              | -4.049060               | 0.026271  | -0.619277 |
| 25               | 8                | 0              | 0.099893                | 3.121100  | -0.924422 |
| 26               | 7                | 0              | 1.136708                | 2.387245  | 0.960944  |
| 27               | 6                | 0              | 1.845113                | 3.651863  | 1.105337  |
| 28               | 1                | 0              | 1.333723                | 4.312743  | 1.815089  |
| 29               | 1                | 0              | 2.855482                | 3.457457  | 1.475220  |
| 30               | 1                | 0              | 1.894623                | 4.147734  | 0.139504  |
| 31               | 6                | 0              | 1.187059                | 1.512083  | 2.122289  |
| 32               | 1                | 0              | 0.510964                | 0.669279  | 2.006735  |
| 33               | 1                | 0              | 2.201770                | 1.130660  | 2.277177  |
| 34               | 1                | 0              | 0.889713                | 2.069713  | 3.017660  |
| 35               | 7                | 0              | -4.921018               | -0.579559 | 0.245459  |
| 36               | 6                | 0              | -4.590643               | -1.001705 | 1.599872  |
| 37               | 1                | 0              | -3.531508               | -0.866676 | 1.801115  |
| 38               | 1                | 0              | -5.158159               | -0.404627 | 2.322569  |
| 39               | 1                | 0              | -4.848690               | -2.055028 | 1.750054  |
| 40               | 6                | 0              | -6.346671               | -0.509309 | -0.050539 |
| 41               | 1                | 0              | -6.822863               | 0.316517  | 0.490771  |
| 42               | 1                | 0              | -6.486149               | -0.352773 | -1.116988 |
| 43               | 1                | 0              | -6.820732               | -1.445947 | 0.252960  |
| 44               | 8                | 0              | -4.422971               | 0.658428  | -1.597607 |

---

## Equilibrium Geometry of TS3 at M06-2X/6-311++G\*\*

# opt=(calcfc,ts,noeigentest) 6-311++g(d,p) scrf=(iefpcm,solvent=chloroform) geom=connectivity m062x

---

| Center<br>Number | Atomic<br>Number | Atomic<br>Type | Coordinates (Angstroms) |           |           |
|------------------|------------------|----------------|-------------------------|-----------|-----------|
|                  |                  |                | X                       | Y         | Z         |
| 1                | 6                | 0              | -4.418822               | -1.356622 | -0.088971 |
| 2                | 6                | 0              | -3.551201               | -2.394874 | 0.079501  |
| 3                | 6                | 0              | -2.168245               | -2.143076 | 0.123824  |
| 4                | 6                | 0              | -1.707710               | -0.832442 | -0.050369 |
| 5                | 6                | 0              | -2.621177               | 0.204711  | -0.206218 |
| 6                | 6                | 0              | -3.945370               | -0.044912 | -0.217366 |
| 7                | 6                | 0              | -1.244997               | -3.177197 | 0.346765  |
| 8                | 6                | 0              | -0.337365               | -0.559954 | -0.066857 |
| 9                | 6                | 0              | 0.569713                | -1.602475 | 0.124708  |
| 10               | 6                | 0              | 0.087747                | -2.905609 | 0.372052  |
| 11               | 6                | 0              | 1.950214                | -1.331170 | 0.056674  |
| 12               | 1                | 0              | 2.673886                | -2.127053 | 0.135242  |
| 13               | 6                | 0              | 2.377901                | -0.051399 | -0.110711 |
| 14               | 6                | 0              | 1.454353                | 1.010766  | -0.247217 |
| 15               | 6                | 0              | 0.123268                | 0.754053  | -0.277282 |
| 16               | 1                | 0              | -1.581853               | -4.179410 | 0.504655  |
| 17               | 1                | 0              | -3.927785               | -3.396244 | 0.178871  |
| 18               | 1                | 0              | -4.633286               | 0.767931  | -0.325656 |
| 19               | 1                | 0              | 0.768000                | -3.689951 | 0.578646  |
| 20               | 1                | 0              | 1.792280                | 2.021690  | -0.334220 |
| 21               | 6                | 0              | -0.472492               | 2.156863  | -0.555360 |
| 22               | 8                | 0              | -0.833964               | 2.446352  | -1.724745 |
| 23               | 9                | 0              | -2.182852               | 1.465429  | -0.341409 |
| 24               | 9                | 0              | -5.742920               | -1.585104 | -0.131684 |
| 25               | 6                | 0              | 3.890012                | 0.236526  | -0.157810 |
| 26               | 8                | 0              | 4.359277                | 1.377830  | -0.307670 |
| 27               | 7                | 0              | 4.691036                | -0.862778 | -0.021844 |
| 28               | 6                | 0              | 5.124962                | -1.312964 | 1.308547  |
| 29               | 1                | 0              | 4.267039                | -1.552557 | 1.901390  |
| 30               | 1                | 0              | 5.742403                | -2.180985 | 1.207528  |
| 31               | 1                | 0              | 5.681294                | -0.533035 | 1.785103  |
| 32               | 6                | 0              | 5.141469                | -1.625741 | -1.194831 |
| 33               | 1                | 0              | 4.290807                | -2.001476 | -1.724073 |
| 34               | 1                | 0              | 5.708970                | -0.987262 | -1.839181 |
| 35               | 1                | 0              | 5.752496                | -2.443838 | -0.875045 |
| 36               | 7                | 0              | -0.641388               | 3.133667  | 0.530102  |
| 37               | 6                | 0              | -0.553869               | 4.443138  | 0.271128  |
| 38               | 1                | 0              | -1.477066               | 4.786537  | -0.146825 |
| 39               | 1                | 0              | -0.354014               | 4.973612  | 1.178628  |
| 40               | 1                | 0              | 0.239477                | 4.616685  | -0.425566 |
| 41               | 6                | 0              | -0.906460               | 2.671493  | 1.900150  |
| 42               | 1                | 0              | -0.458419               | 3.347929  | 2.597712  |
| 43               | 1                | 0              | -1.962865               | 2.635633  | 2.066351  |
| 44               | 1                | 0              | -0.491039               | 1.694504  | 2.033632  |

---

## Equilibrium Geometry for Frequency Calculations of TS2 at M06-2X/6-311++G\*\*

# freq 6-311++g(d,p) scrf=(iefpcm,solvent=chloroform) geom=connectivity m062x

Number of imaginary frequencies = 1

| Center<br>Number | Atomic<br>Number | Atomic<br>Type | Coordinates (Angstroms) |           |           |
|------------------|------------------|----------------|-------------------------|-----------|-----------|
|                  |                  |                | X                       | Y         | Z         |
| 1                | 6                | 0              | -4.577616               | -1.283408 | 0.021040  |
| 2                | 6                | 0              | -3.666681               | -2.299685 | 0.054823  |
| 3                | 6                | 0              | -2.293721               | -2.000527 | -0.036538 |
| 4                | 6                | 0              | -1.810856               | -0.662443 | -0.158974 |
| 5                | 6                | 0              | -2.837931               | 0.306282  | -0.195156 |
| 6                | 6                | 0              | -4.182161               | 0.040969  | -0.107757 |
| 7                | 6                | 0              | -1.380943               | -3.105044 | -0.010442 |
| 8                | 6                | 0              | -0.358656               | -0.417981 | -0.243804 |
| 9                | 6                | 0              | 0.484600                | -1.569502 | -0.203150 |
| 10               | 6                | 0              | -0.056128               | -2.895182 | -0.097135 |
| 11               | 6                | 0              | 1.886205                | -1.465531 | -0.245117 |
| 12               | 1                | 0              | 2.470705                | -2.379213 | -0.212296 |
| 13               | 6                | 0              | 2.504844                | -0.243575 | -0.338172 |
| 14               | 6                | 0              | 1.699115                | 0.895475  | -0.413819 |
| 15               | 6                | 0              | 0.316769                | 0.837371  | -0.350655 |
| 16               | 1                | 0              | -1.787167               | -4.105671 | 0.076867  |
| 17               | 1                | 0              | -3.996232               | -3.326595 | 0.146926  |
| 18               | 1                | 0              | -4.898421               | 0.850405  | -0.148247 |
| 19               | 1                | 0              | 0.639147                | -3.726654 | -0.080946 |
| 20               | 1                | 0              | 2.178308                | 1.861960  | -0.527717 |
| 21               | 6                | 0              | -0.248649               | 2.240020  | -0.485202 |
| 22               | 8                | 0              | -0.348974               | 2.742236  | -1.592954 |
| 23               | 9                | 0              | -2.535575               | 1.604441  | -0.326597 |
| 24               | 9                | 0              | -5.888638               | -1.552511 | 0.109751  |
| 25               | 6                | 0              | 3.993028                | -0.091155 | -0.484478 |
| 26               | 8                | 0              | 4.437973                | 0.667006  | -1.337334 |
| 27               | 7                | 0              | 4.793696                | -0.848106 | 0.307552  |
| 28               | 6                | 0              | 4.398628                | -1.446981 | 1.576465  |
| 29               | 1                | 0              | 3.380032                | -1.173546 | 1.836890  |
| 30               | 1                | 0              | 4.480722                | -2.536527 | 1.534478  |
| 31               | 1                | 0              | 5.064023                | -1.078969 | 2.361960  |
| 32               | 6                | 0              | 6.228723                | -0.809053 | 0.063046  |
| 33               | 1                | 0              | 6.414947                | -0.676863 | -0.999764 |
| 34               | 1                | 0              | 6.700121                | 0.013880  | 0.609729  |
| 35               | 1                | 0              | 6.662911                | -1.751844 | 0.398162  |
| 36               | 7                | 0              | -0.442704               | 2.931461  | 0.666481  |
| 37               | 6                | 0              | -0.981316               | 4.279016  | 0.561053  |
| 38               | 1                | 0              | -2.073906               | 4.255915  | 0.479004  |
| 39               | 1                | 0              | -0.702479               | 4.840223  | 1.453195  |
| 40               | 1                | 0              | -0.571931               | 4.765790  | -0.320325 |
| 41               | 6                | 0              | -0.651057               | 2.275186  | 1.947079  |
| 42               | 1                | 0              | -0.251034               | 2.906017  | 2.742269  |
| 43               | 1                | 0              | -1.719966               | 2.115099  | 2.131290  |
| 44               | 1                | 0              | -0.137981               | 1.316283  | 1.975566  |

## Equilibrium Geometry of Control Amide 8 at M06-2X/6-311++G\*\* (For Amide Isomerization)

# opt freq 6-311++g(d,p) scrf=(iefpcm,solvent=dmsol) geom=connectivity m062x temperature=393.15

| Center Number | Atomic Number | Atomic Type | Coordinates (Angstroms) |           |           |
|---------------|---------------|-------------|-------------------------|-----------|-----------|
|               |               |             | X                       | Y         | Z         |
| 1             | 6             | 0           | -2.995270               | 0.680165  | 0.569445  |
| 2             | 6             | 0           | -4.357455               | 0.773006  | 0.691277  |
| 3             | 6             | 0           | -5.103412               | -0.378111 | 0.446893  |
| 4             | 6             | 0           | -4.521490               | -1.581730 | 0.160558  |
| 5             | 6             | 0           | -3.118241               | -1.651462 | 0.054426  |
| 6             | 6             | 0           | -2.487464               | -2.934490 | -0.091766 |
| 7             | 6             | 0           | -1.142693               | -3.046374 | -0.064119 |
| 8             | 6             | 0           | -0.300172               | -1.881153 | -0.041129 |
| 9             | 6             | 0           | 1.096487                | -2.041944 | -0.108967 |
| 10            | 6             | 0           | 1.930010                | -0.950666 | -0.189703 |
| 11            | 6             | 0           | 1.361207                | 0.326808  | -0.313482 |
| 12            | 6             | 0           | -0.006203               | 0.516460  | -0.263095 |
| 13            | 6             | 0           | -0.874494               | -0.585124 | -0.029879 |
| 14            | 6             | 0           | -2.314019               | -0.487321 | 0.171888  |
| 15            | 6             | 0           | 3.412783                | -1.169467 | -0.307050 |
| 16            | 6             | 0           | 5.666166                | -0.441571 | 0.158957  |
| 17            | 6             | 0           | 3.828117                | 0.506125  | 1.495745  |
| 18            | 6             | 0           | -0.504649               | 1.851764  | -0.760787 |
| 19            | 6             | 0           | 0.559280                | 3.016997  | 1.150591  |
| 20            | 6             | 0           | -0.370787               | 4.254961  | -0.760386 |
| 21            | 7             | 0           | 4.228980                | -0.330182 | 0.369061  |
| 22            | 7             | 0           | 0.004789                | 2.967224  | -0.196032 |
| 23            | 8             | 0           | 3.839153                | -2.065225 | -1.032627 |
| 24            | 8             | 0           | -1.259541               | 1.876952  | -1.728566 |
| 25            | 1             | 0           | -4.825946               | 1.696943  | 1.002525  |
| 26            | 1             | 0           | -5.127785               | -2.471751 | 0.049166  |
| 27            | 1             | 0           | -3.119223               | -3.811937 | -0.165421 |
| 28            | 1             | 0           | -0.666712               | -4.019532 | -0.104834 |
| 29            | 1             | 0           | 1.515665                | -3.042182 | -0.109750 |
| 30            | 1             | 0           | 2.004123                | 1.180647  | -0.504641 |
| 31            | 1             | 0           | 6.109082                | -1.159770 | 0.855799  |
| 32            | 1             | 0           | 5.862941                | -0.767429 | -0.859242 |
| 33            | 1             | 0           | 6.118139                | 0.536896  | 0.324434  |
| 34            | 1             | 0           | 4.493153                | 0.298382  | 2.337185  |
| 35            | 1             | 0           | 3.906409                | 1.566603  | 1.241633  |
| 36            | 1             | 0           | 2.810668                | 0.282027  | 1.805198  |
| 37            | 1             | 0           | -0.070879               | 3.657228  | 1.774531  |
| 38            | 1             | 0           | 0.583980                | 2.025407  | 1.594322  |
| 39            | 1             | 0           | 1.570516                | 3.430849  | 1.130749  |
| 40            | 1             | 0           | 0.403499                | 4.981776  | -0.513442 |
| 41            | 1             | 0           | -0.460520               | 4.171324  | -1.840613 |
| 42            | 1             | 0           | -1.325687               | 4.598134  | -0.348032 |
| 43            | 1             | 0           | -2.433030               | 1.542901  | 0.860084  |
| 44            | 1             | 0           | -6.167884               | -0.310869 | 0.532205  |

## Equilibrium Geometry for TS of Amide Isomerization of Control Amide 8 at M06-2X/6-311++G\*\*

# opt=(calcfc,ts,noeigentest) freq 6-311++g(d,p) scrf=(iefpcm,solvent=dms0) geom=connectivity m062x  
temperature=393.15

Number of imaginary frequencies = 1

| Center<br>Number | Atomic<br>Number | Atomic<br>Type | Coordinates (Angstroms) |           |           |
|------------------|------------------|----------------|-------------------------|-----------|-----------|
|                  |                  |                | X                       | Y         | Z         |
| 1                | 6                | 0              | 1.876448                | -0.990355 | -0.138228 |
| 2                | 1                | 0              | 1.412908                | -3.052984 | -0.416070 |
| 3                | 6                | 0              | 1.014972                | -2.053898 | -0.274746 |
| 4                | 6                | 0              | -0.018371               | 0.531730  | -0.117810 |
| 5                | 6                | 0              | -0.381254               | -1.867159 | -0.229896 |
| 6                | 6                | 0              | 1.346492                | 0.310167  | -0.103196 |
| 7                | 6                | 0              | -0.919747               | -0.572254 | -0.042797 |
| 8                | 6                | 0              | -1.256244               | -2.988480 | -0.439002 |
| 9                | 1                | 0              | 2.009724                | 1.166470  | -0.124406 |
| 10               | 6                | 0              | -2.598079               | -2.832216 | -0.449832 |
| 11               | 1                | 0              | -0.809521               | -3.958205 | -0.627389 |
| 12               | 1                | 0              | -3.255625               | -3.666673 | -0.663454 |
| 13               | 6                | 0              | -3.188953               | -1.574100 | -0.086411 |
| 14               | 6                | 0              | -4.587077               | -1.481481 | 0.070344  |
| 15               | 6                | 0              | -2.347975               | -0.467856 | 0.199869  |
| 16               | 6                | 0              | -5.117516               | -0.329845 | 0.580796  |
| 17               | 1                | 0              | -5.227083               | -2.319316 | -0.176040 |
| 18               | 6                | 0              | -4.326153               | 0.738045  | 1.005766  |
| 19               | 1                | 0              | -4.756169               | 1.602403  | 1.493646  |
| 20               | 6                | 0              | -2.973078               | 0.630708  | 0.824094  |
| 21               | 6                | 0              | -0.459959               | 1.905518  | -0.518355 |
| 22               | 8                | 0              | -1.465864               | 2.088649  | -1.158868 |
| 23               | 7                | 0              | 0.444240                | 2.975878  | -0.189036 |
| 24               | 6                | 0              | 1.038719                | 3.519015  | -1.419210 |
| 25               | 1                | 0              | 1.775280                | 4.273558  | -1.140571 |
| 26               | 1                | 0              | 0.284490                | 3.977688  | -2.071584 |
| 27               | 1                | 0              | 1.545587                | 2.724272  | -1.970061 |
| 28               | 6                | 0              | -0.269244               | 4.029908  | 0.543590  |
| 29               | 1                | 0              | 0.453039                | 4.799464  | 0.818409  |
| 30               | 1                | 0              | -0.702506               | 3.617166  | 1.454662  |
| 31               | 1                | 0              | -1.064808               | 4.485504  | -0.059474 |
| 32               | 6                | 0              | 3.357337                | -1.240901 | -0.214600 |
| 33               | 8                | 0              | 3.792414                | -2.049937 | -1.031522 |
| 34               | 7                | 0              | 4.163491                | -0.523457 | 0.599000  |
| 35               | 6                | 0              | 5.605259                | -0.654054 | 0.436433  |
| 36               | 1                | 0              | 5.995741                | -1.473897 | 1.047139  |
| 37               | 1                | 0              | 6.075004                | 0.277515  | 0.753420  |
| 38               | 1                | 0              | 5.840564                | -0.845401 | -0.607433 |
| 39               | 6                | 0              | 3.735998                | 0.173327  | 1.807774  |
| 40               | 1                | 0              | 4.347299                | -0.173143 | 2.644314  |
| 41               | 1                | 0              | 2.695701                | -0.040958 | 2.036442  |
| 42               | 1                | 0              | 3.870162                | 1.252868  | 1.701626  |
| 43               | 1                | 0              | -2.369172               | 1.407330  | 1.244874  |
| 44               | 1                | 0              | -6.176574               | -0.245210 | 0.707816  |
